# Supplementary material
Source: publisher site journal article supplement (https://www.spandidos-publications.com/8018/downloadSupplementary)
Supplement: Supplementary file 1 [file downloadSupplementary]

## Sheet: Supplemental Table S2
Table SII. List of negatively selected genes identified by MAGeCK analysis.
id	neg|score	neg|p-value	neg|fdr	neg|rank	neg|lfc	neg|goodsgrna
ANKS3	6.52e-09	2.28e-07	0.000413	1	-0.81635	5
RPUSD4	6.4e-08	2.28e-07	0.000413	2	-1.4578	6
UROD	5.13e-07	2.28e-07	0.000413	3	-1.0065	5
ISCA2	6.18e-07	2.28e-07	0.000413	4	-2.0996	5
FOXRED1	1.03e-06	2.28e-07	0.000413	5	-1.2328	5
CENPP	1.15e-06	2.28e-07	0.000413	6	-1.5902	5
DPH6	1.46e-06	2.28e-07	0.000413	7	-1.5693	3
OGN	1.55e-06	2.28e-07	0.000413	8	-2.4704	6
TPI1	2e-06	2.28e-07	0.000413	9	-2.4555	6
SELRC1	2.35e-06	2.28e-07	0.000413	10	-3.455	6
MPRIP	2.43e-06	2.28e-07	0.000413	11	-0.71411	5
MRPL36	4.87e-06	6.85e-07	0.001061	12	-3.6231	6
LAMTOR5	6.01e-06	6.85e-07	0.001061	13	-0.56751	5
SORCS2	7.41e-06	1.14e-06	0.00165	14	-0.88745	5
ENO1	1.44e-05	3.43e-06	0.004125	15	-1.0485	4
hsa-mir-29b-1	1.67e-05	2.51e-06	0.003203	16	-2.5318	4
KDM8	1.92e-05	2.51e-06	0.003203	17	-0.72602	5
GMPPB	2.35e-05	4.8e-06	0.00452	18	-1.9997	4
REXO2	2.57e-05	3.88e-06	0.004275	19	-1.3481	6
CIAO1	2.72e-05	4.34e-06	0.004275	20	-1.6574	5
GLRX5	3e-05	4.34e-06	0.004275	21	-1.1947	6
SCGB1C1	3.43e-05	4.34e-06	0.004275	22	-1.1932	4
ATP5O	4.5e-05	1.3e-05	0.008113	23	-1.1547	5
MARS2	4.65e-05	8e-06	0.006931	24	-1.8243	6
DTYMK	4.86e-05	8.91e-06	0.007426	25	-1.2228	6
MRE11A	4.98e-05	1.07e-05	0.008086	26	-1.0632	5
RBBP4	5.01e-05	1.07e-05	0.008086	27	-2.9385	6
HSCB	5.01e-05	1.39e-05	0.008162	28	-1.4439	5
KIAA0391	5.13e-05	7.08e-06	0.006394	29	-1.5053	4
FASN	5.87e-05	1.76e-05	0.00953	30	-0.79057	5
LAMTOR3	5.93e-05	1.12e-05	0.008086	31	-0.74567	6
FBXL4	6.32e-05	1.12e-05	0.008086	32	0.25622	3
NSMCE1	6.46e-05	1.81e-05	0.009539	33	-1.0661	4
NSUN4	6.75e-05	1.85e-05	0.009547	34	-0.94641	4
DNLZ	7.04e-05	1.17e-05	0.008113	35	-0.96359	5
MTG1	8.02e-05	1.3e-05	0.008113	36	-1.2178	6
MAP1LC3B	8.33e-05	1.3e-05	0.008113	37	-0.63763	6
NDUFAF3	8.74e-05	2.17e-05	0.010204	38	-1.1588	5
OR9G4	9.12e-05	1.35e-05	0.008113	39	-0.92559	6
SOD2	9.33e-05	1.35e-05	0.008113	40	-0.89976	5
XRCC6	9.64e-05	2.31e-05	0.010204	41	-2.7423	5
ASH2L	9.89e-05	1.62e-05	0.00925	42	-1.0993	5
MIEN1	0.00010089	1.67e-05	0.009266	43	-1.0046	6
OSGEP	0.00010758	2.44e-05	0.010368	44	-1.082	5
SARS2	0.00011013	2.44e-05	0.010368	45	-1.1159	5
ZNF658	0.00011075	1.9e-05	0.009556	46	-1.0324	6
TRAPPC5	0.00011562	2.49e-05	0.010368	47	-0.81375	4
NARS2	0.00011865	1.94e-05	0.009563	48	-1.3855	6
TARS2	0.00011956	2.12e-05	0.010204	49	-1.3826	6
CARS2	0.0001228	2.26e-05	0.010204	50	-1.0852	5
TIMM23	0.0001232	2.31e-05	0.010204	51	-1.7433	6
GTPBP5	0.00012597	2.54e-05	0.010368	52	-0.46977	6
PEMT	0.00013009	2.76e-05	0.010509	53	-0.88185	6
GLMN	0.00013243	2.76e-05	0.010509	54	-0.45714	5
COQ2	0.00013276	2.76e-05	0.010509	55	-1.6832	6
WIBG	0.0001332	2.76e-05	0.010509	56	-1.3413	5
COQ5	0.00013624	4.04e-05	0.013704	57	-0.51664	3
MRPL3	0.00014171	4.04e-05	0.013704	58	-1.6358	5
GTF3C4	0.00014586	4.04e-05	0.013704	59	-1.088	5
RPN1	0.00015872	3.72e-05	0.013704	60	-1.2512	6
RBFA	0.000159	3.77e-05	0.013704	61	-1.5893	5
CDIPT	0.00016249	4.32e-05	0.013704	62	-2.0965	5
MRPL20	0.00016665	3.86e-05	0.013704	63	-0.86849	4
PPTC7	0.00016837	4.18e-05	0.013704	64	-1.3251	6
TAF13	0.00017271	4.36e-05	0.013704	65	-0.80626	4
HSD17B10	0.00017458	4.36e-05	0.013704	66	-0.69524	5
GFM1	0.00018343	6.37e-05	0.019066	67	-1.1182	5
POU3F2	0.00018683	4.18e-05	0.013704	68	-0.7957	3
ARHGAP35	0.00018863	6.47e-05	0.019066	69	-0.95234	6
OR5L2	0.00018894	6.47e-05	0.019066	70	-0.65017	5
VPS45	0.00019424	6.51e-05	0.019066	71	-0.9663	5
MRP63	0.00019971	7.61e-05	0.019862	72	-0.8902	5
BMPER	0.00020327	6.79e-05	0.019223	73	-0.79301	5
MCAT	0.00020349	4.36e-05	0.013704	74	-0.69782	3
NDUFS7	0.00020504	6.79e-05	0.019223	75	-1.2838	6
WRB	0.00020766	4.96e-05	0.015347	76	-0.85891	2
ZC3HC1	0.00021287	6.83e-05	0.019223	77	-0.65561	5
PGS1	0.00023047	8.57e-05	0.021415	78	-0.90155	5
POLG	0.00023936	7.29e-05	0.019741	79	-1.7017	6
LONP1	0.00023936	7.29e-05	0.019741	80	-3.6214	6
CD63	0.00024355	8.8e-05	0.021415	81	-0.77237	3
WDR83	0.00024864	8.8e-05	0.021415	82	-0.87209	5
SLC2A1	0.00024973	7.33e-05	0.019741	83	-0.54676	4
THG1L	0.00025421	7.84e-05	0.019977	84	-0.92951	6
DMAP1	0.00025472	7.84e-05	0.019977	85	-1.5855	6
NELFCD	0.00026527	7.38e-05	0.019741	86	-0.85891	4
UFL1	0.00027751	8.61e-05	0.021415	87	-0.98815	6
TRMT61A	0.00028682	8.93e-05	0.021507	88	-0.32679	4
FAM157A	0.00029185	7.56e-05	0.019862	89	-0.85891	3
TBL1X	0.00030291	9.8e-05	0.022355	90	-0.78108	5
PARS2	0.00030503	9.71e-05	0.022355	91	-1.2234	3
NAA20	0.00030669	9.25e-05	0.021559	92	-1.9805	5
RAB22A	0.00030669	9.25e-05	0.021559	93	-2.351	6
TRIT1	0.00031059	9.25e-05	0.021559	94	-1.2158	5
GAPDH	0.00032152	0.00010259	0.023154	95	-1.3304	3
RNF151	0.0003284	0.00010807	0.023995	96	-0.6366	5
TMCO6	0.00034067	0.00010853	0.023995	97	-0.65315	6
COQ4	0.00035652	0.00011995	0.025733	98	-1.0324	6
GNB1L	0.00035859	0.00011995	0.025733	99	-2.054	6
MZF1	0.00036081	0.00011858	0.025733	100	-1.1873	4
UQCRQ	0.00037742	0.00012726	0.02648	101	-0.86275	5
TACC1	0.00037742	0.00012726	0.02648	102	-1.7805	6
FKBP4	0.00041329	0.00012498	0.02648	103	-0.45994	3
RPE	0.00043192	0.00015148	0.030108	104	-0.74577	5
MYBL2	0.00044178	0.00012955	0.02648	105	-0.91101	5
PATE4	0.00044181	0.00015285	0.030108	106	-0.73903	5
SYS1	0.00044559	0.00012955	0.02648	107	-0.78881	4
XRN2	0.00044768	0.00013549	0.027436	108	-0.71862	5
HAUS6	0.00045231	0.00015605	0.030258	109	-1.1154	6
E4F1	0.00045756	0.00015742	0.030258	110	-1.3226	6
RBM44	0.00048511	0.00016062	0.030258	111	-1.2199	6
STX4	0.00049394	0.00014234	0.028557	112	-0.98114	5
METTL1	0.00049942	0.00016702	0.03093	113	-0.85891	4
FCHSD2	0.00050182	0.00016154	0.030258	114	-1.9695	6
TIMM17A	0.00050238	0.00016154	0.030258	115	-1.4924	5
WDR1	0.00051828	0.00016199	0.030258	116	-1.4628	5
PTPMT1	0.0005256	0.00018073	0.032906	117	-1.1665	5
DOLK	0.00053178	0.00018073	0.032906	118	-0.44736	4
TRMT112	0.00055278	0.00019032	0.034081	119	-2.7319	5
OR5M11	0.0005551	0.0002936	0.043571	120	-0.85891	4
NOC2L	0.00058068	0.00019809	0.035181	121	-1.4671	5
ZNF442	0.00059864	0.00020906	0.036265	122	-0.75853	5
SUCLA2	0.00062687	0.0001853	0.033457	123	-1.4719	6
PNN	0.00065478	0.00027349	0.042438	124	-0.88144	4
ATP5L	0.00066535	0.00027623	0.042438	125	-3.0431	5
ATG9A	0.0006664	0.00020997	0.036265	126	-1.2541	5
ATG7	0.0006709	0.00021226	0.036265	127	-1.2146	6
ATP5A1	0.00067517	0.00021317	0.036265	128	-2.8346	6
FYTTD1	0.00067756	0.00021363	0.036265	129	-1.0405	6
RASA4	0.00068665	0.00021454	0.036265	130	-0.82438	6
TSEN15	0.00069357	0.00021591	0.036265	131	0.18878	2
LGR5	0.00069908	0.00029634	0.043679	132	-0.72591	5
OR2T34	0.00070218	0.00022871	0.037482	133	-0.75192	5
SLC52A2	0.00071091	0.00022917	0.037482	134	-1.0324	6
RPTOR	0.00071153	0.00022917	0.037482	135	0.23024	3
NDOR1	0.00071529	0.00023008	0.037482	136	-2.7101	5
FEN1	0.00073719	0.00023237	0.037572	137	-1.0512	5
C6orf136	0.00074185	0.00030776	0.044754	138	-1.1704	4
LAMTOR2	0.00074417	0.00023648	0.037675	139	-0.95076	5
C2orf27A	0.00074454	0.00030776	0.044754	140	-0.93939	5
ADAMTS13	0.00074677	0.00023648	0.037675	141	-0.65816	4
FAM134A	0.00076226	0.00031919	0.046106	142	-1.021	5
TAF1A	0.00076623	0.00028309	0.042438	143	-2.0291	6
GNB2L1	0.00079643	0.00028354	0.042438	144	-1.4473	5
TELO2	0.0008045	0.000284	0.042438	145	-0.75135	5
SLC24A5	0.00080493	0.000284	0.042438	146	-0.69113	6
WRAP53	0.00081437	0.000284	0.042438	147	-0.62297	5
COASY	0.00082706	0.000284	0.042438	148	-0.20765	3
KDELR1	0.00083307	0.000284	0.042438	149	-1.1432	6
DCLRE1A	0.00085402	0.00032741	0.046981	150	-1.1277	4
LRPPRC	0.00090158	0.00040053	0.055989	151	-0.89344	5
INTS6	0.00093874	0.00038271	0.054197	152	-1.9786	6
PFKP	0.00096493	0.00039322	0.055323	153	-0.59463	4
CDC14B	0.00098455	0.00052071	0.064273	154	-0.69129	4
NARF	0.00098804	0.00052116	0.064273	155	-0.67204	3
APOBEC3B	0.0010081	0.00052756	0.064273	156	-0.3671	2
ODF3L2	0.0010227	0.00052802	0.064273	157	-0.78407	4
FKBPL	0.0010263	0.0004083	0.056709	158	-1.7134	6
ELP6	0.0010379	0.00052665	0.064273	159	-0.85891	3
CATSPERG	0.0010402	0.00052802	0.064273	160	-0.34522	2
LSM7	0.0010545	0.00054538	0.066016	161	-1.4451	5
TNS4	0.0010704	0.0004316	0.058764	162	-1.254	5
UTP3	0.0010765	0.00056915	0.068509	163	-0.48851	3
CPSF4	0.0010832	0.00043617	0.058764	164	-1.3487	6
LYNX1	0.001106	0.0006025	0.072124	165	-0.69651	5
ARL16	0.0011092	0.00043708	0.058764	166	-2.4753	6
KNTC1	0.0011153	0.00043708	0.058764	167	-0.66921	4
KIAA1462	0.0011204	0.00043891	0.058764	168	-0.62672	6
HGS	0.0011254	0.00043937	0.058764	169	-0.74764	4
CSE1L	0.0011365	0.00044485	0.059133	170	-2.2423	6
TKT	0.0011372	0.00046587	0.061046	171	-0.51646	3
OAZ2	0.0011496	0.00046633	0.061046	172	-3.0529	6
BRAT1	0.0011735	0.00062535	0.074041	173	-0.71199	5
KATNB1	0.0011739	0.0004677	0.061046	174	-0.90587	6
TUBB4B	0.001232	0.00064317	0.075737	175	-1.339	4
ERO1LB	0.0012423	0.00050197	0.064273	176	-1.0698	4
MRPL54	0.0012545	0.00065871	0.076693	177	-0.81597	5
NAA15	0.0012651	0.00066145	0.076693	178	-0.85891	4
ARGLU1	0.0012675	0.00068156	0.07855	179	-1.1236	5
hsa-mir-4720	0.0012728	0.00066191	0.076693	180	-1.2721	4
ZNF185	0.0012733	0.00050746	0.064273	181	-0.38352	3
DNAJC11	0.0012826	0.00050791	0.064273	182	-1.0445	6
INMT	0.0012962	0.00051065	0.064273	183	-0.61005	6
GPI	0.0013022	0.00051705	0.064273	184	-0.67758	5
CYC1	0.0013036	0.00051751	0.064273	185	-0.14253	4
MRPS25	0.0013302	0.00061941	0.073741	186	-0.83317	4
TRIM37	0.0013659	0.00070578	0.08091	187	-0.79997	4
CSRNP2	0.0013879	0.00076838	0.084954	188	-1.0125	6
ECI2	0.0013952	0.00076838	0.084954	189	-1.833	5
CLASRP	0.0014087	0.00079169	0.084954	190	-0.84959	6
MRPS18C	0.0014099	0.00084195	0.084954	191	-0.66788	4
KIF19	0.0014193	0.00079169	0.084954	192	-1.4269	5
BAP1	0.0014267	0.00084195	0.084954	193	-0.78457	4
ANKRD66	0.0014403	0.00084195	0.084954	194	-0.51463	4
MDC1	0.0014543	0.00079214	0.084954	195	-1.1269	5
MTERFD2	0.0014699	0.00081134	0.084954	196	-0.72555	6
HOMER1	0.0014843	0.00084561	0.084954	197	-0.64422	4
TMEM247	0.0014933	0.00081179	0.084954	198	-0.76322	6
PNKP	0.0015109	0.00082596	0.084954	199	-0.87879	5
NDUFAB1	0.0015184	0.00082642	0.084954	200	-1.7551	5
SOX15	0.0015253	0.00082642	0.084954	201	-0.14277	4
TBC1D8	0.0015322	0.0009274	0.084954	202	-1.0499	5
STEAP2	0.0015465	0.00084652	0.084954	203	-0.74757	6
UBE2M	0.0015485	0.0009274	0.084954	204	-1.0062	4
ZBTB8OS	0.0015557	0.0009274	0.084954	205	-1.3905	5
NEDD8	0.0015557	0.0009274	0.084954	206	-1.9627	5
ZNF259	0.0015675	0.00085018	0.084954	207	-0.63138	4
NDUFB10	0.0016119	0.00085475	0.084954	208	-1.2442	5
hsa-mir-4281	0.0016322	0.00035118	0.050059	209	-1.1947	2
NDUFS5	0.0016372	0.00086023	0.084954	210	-0.33017	5
PFKFB2	0.0016428	0.00086023	0.084954	211	-1.0416	6
NTN4	0.0016808	0.00087485	0.084954	212	-0.46766	4
RSL1D1	0.001687	0.00096716	0.084954	213	-0.59455	3
KLHDC10	0.0017337	0.00087851	0.084954	214	-0.64492	4
TBC1D26	0.001742	0.00087897	0.084954	215	-0.6644	6
SORCS3	0.0017477	0.00087988	0.084954	216	-0.70237	5
E2F1	0.0017631	0.00088034	0.084954	217	-1.3062	5
NPY4R	0.0017643	0.00088034	0.084954	218	-1.4084	5
KCTD13	0.0017649	0.00088765	0.084954	219	-0.99712	6
KDM4E	0.0017897	0.00089222	0.084954	220	-1.4324	5
SSBP1	0.0018024	0.00089222	0.084954	221	-0.38211	5
LSM10	0.0018077	0.0010581	0.090259	222	-1.0209	4
KRTAP4-7	0.0018083	0.00079626	0.084954	223	-0.80902	4
ELP5	0.0018177	0.0011764	0.091424	224	-1.3489	4
ARPC4	0.0018214	0.00089267	0.084954	225	-1.4349	6
TARDBP	0.0018225	0.00079626	0.084954	226	-0.90163	4
HDAC11	0.001833	0.00092649	0.084954	227	-0.66371	6
BCL2L12	0.0018334	0.00092649	0.084954	228	-1.3185	6
TEN1	0.0018338	0.00092649	0.084954	229	-1.1992	6
UBTD1	0.0018381	0.0011769	0.091424	230	-0.73916	5
SRRM2	0.0018462	0.00092649	0.084954	231	-1.0032	5
TIMM50	0.0018559	0.00092695	0.084954	232	-1.7003	4
ELL2	0.0018595	0.00079671	0.084954	233	-0.75847	4
XCL1	0.0018712	0.001224	0.091424	234	-0.92765	5
H2BFM	0.0018718	0.0012244	0.091424	235	-0.50832	4
PFKFB3	0.0018732	0.0012244	0.091424	236	-1.1478	5
CEACAM16	0.0018736	0.0012244	0.091424	237	-0.52105	4
SLC38A4	0.0018826	0.0012244	0.091424	238	-0.73258	5
ANKMY1	0.0018912	0.00095391	0.084954	239	-0.59615	4
ARMC7	0.0018919	0.00095391	0.084954	240	-1.5964	6
DSC2	0.0018931	0.00095391	0.084954	241	-2.6857	6
KIAA0753	0.0018952	0.00095436	0.084954	242	-0.72706	4
CNOT7	0.0019103	0.00096487	0.084954	243	-0.60609	6
BRF1	0.0019132	0.0012569	0.091424	244	-0.87142	3
YPEL5	0.0019157	0.0012573	0.091424	245	-0.8829	4
ERCC1	0.001916	0.00096853	0.084954	246	-1.5421	6
ZFP1	0.001916	0.00096853	0.084954	247	-0.77033	5
MECR	0.001918	0.0012573	0.091424	248	-0.79131	3
MRPL38	0.0019192	0.00096853	0.084954	249	-1.4676	5
MSTO1	0.0019231	0.00096853	0.084954	250	-0.87292	6
POU5F1	0.0019506	0.00071583	0.081631	251	-0.85891	2
SNX8	0.001954	0.0012619	0.091424	252	-0.62886	4
CA6	0.0019639	0.0009699	0.084954	253	-0.88076	6
CHST9	0.0019641	0.0012619	0.091424	254	-0.42506	2
FDX1L	0.0019737	0.00097219	0.084954	255	-2.7261	5
TMEM52	0.0019835	0.0012624	0.091424	256	-0.29506	2
R3HDML	0.001986	0.0012624	0.091424	257	-0.67613	3
INO80D	0.0020016	0.0009763	0.084954	258	-0.56205	6
FNDC1	0.0020019	0.0009763	0.084954	259	-1.154	5
HAUS4	0.002037	0.0012774	0.091424	260	-1.0828	4
VEZT	0.0020731	0.0012774	0.091424	261	-1.1968	5
TRAPPC1	0.0020795	0.0010151	0.087282	262	-0.26645	4
C10orf2	0.0020829	0.0010151	0.087282	263	-1.1104	5
LMNA	0.0020903	0.0009667	0.084954	264	-0.85891	4
hsa-mir-8079	0.0020942	0.00090227	0.084954	265	-1.235	3
RTN4IP1	0.0020964	0.0012779	0.091424	266	-0.88529	3
BTN2A1	0.0021027	0.0012779	0.091424	267	-0.17174	3
AASDHPPT	0.002104	0.001171	0.091424	268	-1.2647	6
TAF4	0.0021187	0.0012779	0.091424	269	-0.9136	4
TSEN34	0.0021276	0.0011993	0.091424	270	-0.34581	5
hsa-mir-3671	0.0021282	0.00090273	0.084954	271	-1.4672	3
THOC3	0.0021288	0.00097356	0.084954	272	-0.83557	2
BMP10	0.0021349	0.0011993	0.091424	273	-0.24748	5
SECTM1	0.0021436	0.0011993	0.091424	274	-0.37821	5
MRPL18	0.0021437	0.0012779	0.091424	275	-0.78503	4
MRPS21	0.0021488	0.0012779	0.091424	276	-1.1654	4
ZNF721	0.0021588	0.0013076	0.091424	277	-1.0062	5
GPT	0.0021588	0.0013076	0.091424	278	-0.88573	5
RFC5	0.0021588	0.0013076	0.091424	279	-1.5935	5
CDC25B	0.0021737	0.0013076	0.091424	280	-0.85788	4
RARB	0.0021874	0.0011998	0.091424	281	-0.4494	6
NHLRC3	0.002191	0.0013081	0.091424	282	-0.8661	5
ITPKA	0.0021923	0.0011998	0.091424	283	-0.75563	5
PIGN	0.0021981	0.0011998	0.091424	284	-0.85726	6
EDEM1	0.0022076	0.0010302	0.088228	285	-0.66106	3
PTPRM	0.0022106	0.0013081	0.091424	286	-0.84691	4
TERT	0.002221	0.0011998	0.091424	287	-0.53675	6
WBSCR16	0.0022324	0.0011998	0.091424	288	-1.1118	6
GABRA3	0.0022403	0.0011998	0.091424	289	-0.43097	4
TSR3	0.0022403	0.0011998	0.091424	290	-0.89229	5
XRCC3	0.0022403	0.0011998	0.091424	291	-2.0136	6
ZNF614	0.0022485	0.0012107	0.091424	292	-0.85227	6
FAM207A	0.0022521	0.0012135	0.091424	293	-0.61901	5
KIAA0195	0.0022728	0.0012249	0.091424	294	-0.81108	6
ATPAF2	0.0022772	0.0012253	0.091424	295	-0.9104	6
KIAA1324	0.0022973	0.0011522	0.091424	296	-0.70506	4
U2AF2	0.0023101	0.0012345	0.091424	297	-1.5033	5
OR8S1	0.0023229	0.0012397	0.091424	298	-0.84887	5
hsa-mir-1250	0.0023231	0.0011527	0.091424	299	-2.4786	3
TFB2M	0.0023335	0.00134	0.092205	300	-0.017632	2
VPS35	0.0023441	0.0013405	0.092205	301	-0.66064	5
DPPA5	0.0023573	0.0012518	0.091424	302	-0.39863	4
IFNB1	0.0023611	0.0012518	0.091424	303	-0.90669	6
PAK1	0.002364	0.0012518	0.091424	304	-0.66346	5
hsa-mir-8072	0.0023664	0.0012039	0.091424	305	-3.1917	4
TRIM49B	0.0023819	2.28e-07	0.000413	306	-1.1459	1
ATP2B1	0.0024063	0.0012898	0.091424	307	-0.59411	5
RNMT	0.0024091	0.0012043	0.091424	308	-0.99366	3
GTF2H4	0.0024258	0.0013611	0.092254	309	-0.57334	5
C6orf62	0.0024478	0.0013167	0.091473	310	-1.2181	6
SNRPB	0.0024501	0.0013172	0.091473	311	-1.0142	5
BRCC3	0.0024569	0.0013898	0.092254	312	-0.8286	5
RPL22	0.002461	0.0013323	0.092205	313	-1.5916	6
BRINP3	0.0024725	0.0013528	0.092254	314	-0.52387	4
CD44	0.0024887	0.0014004	0.092254	315	-1.4973	4
APOBEC3F	0.0025182	0.0014004	0.092254	316	-0.68834	4
MRPS14	0.002521	0.0014004	0.092254	317	-0.79284	5
KIAA1704	0.0025268	0.0011376	0.091424	318	-2.872	2
AARS	0.0025278	0.0012724	0.091424	319	-0.85891	4
STPG2	0.0025367	0.0014004	0.092254	320	-0.89206	5
PHGR1	0.0025495	0.0013999	0.092254	321	-0.43299	4
PRR15L	0.0025561	0.0013999	0.092254	322	-0.49206	5
PRAMEF15	0.0025579	0.0013999	0.092254	323	-0.50373	5
SAP18	0.0025691	0.0012902	0.091424	324	-0.56767	2
CHMP3	0.0026088	0.0014168	0.092453	325	-0.67457	4
WDR26	0.0026152	0.0014008	0.092254	326	-0.78348	5
EEF1A1	0.0026326	0.0014081	0.092453	327	-0.70247	5
COX19	0.0026566	0.0014369	0.092453	328	-0.3454	3
TNFRSF9	0.0027001	0.0016224	0.100154	329	-0.60652	6
GTPBP10	0.0027028	0.0014369	0.092453	330	-0.42305	2
POLE4	0.0027175	0.0014374	0.092453	331	-0.75853	5
NDUFA13	0.002727	0.0014374	0.092453	332	-0.7686	4
TTC36	0.0027865	0.0016394	0.100154	333	-0.69734	6
ASGR1	0.0028206	0.0014461	0.092453	334	-0.57879	4
HHEX	0.0028207	0.0016572	0.100154	335	-0.75293	6
F2	0.0028374	0.0016572	0.100154	336	-0.45713	6
NSMCE4A	0.0028412	0.0014461	0.092453	337	-0.26239	4
ADSS	0.0028471	0.0016663	0.100289	338	-1.1977	5
hsa-mir-2909	0.0028568	0.0013547	0.092254	339	-3.0709	3
PET112	0.0028991	0.0014465	0.092453	340	-0.81529	4
KIF1B	0.0029014	0.0013551	0.092254	341	-0.4323	2
CDC20	0.002928	0.0014776	0.093859	342	-1.6779	5
COMT	0.0029657	0.0018244	0.106396	343	-0.40836	5
TFDP1	0.0029685	0.0014863	0.093859	344	-0.74751	4
HOOK2	0.0029702	0.0018267	0.106396	345	-1.4068	6
FASTKD3	0.0029713	0.0014863	0.093859	346	-0.70493	5
RAD51	0.0029766	0.0018372	0.106542	347	-1.2079	6
WTIP	0.0029976	0.001839	0.106542	348	-1.3298	6
EIF1AX	0.0029987	0.001494	0.093859	349	-1.0181	4
RMI1	0.0030185	0.0018482	0.106738	350	-0.18993	4
ZNF599	0.0030325	0.0014945	0.093859	351	-1.1549	5
YTHDF1	0.0030578	0.0018523	0.106738	352	-0.73112	6
JRK	0.0030719	0.0015064	0.094088	353	-0.37613	3
C16orf72	0.0031099	0.0018692	0.107421	354	-0.99262	5
SNF8	0.0031177	0.0018879	0.107421	355	-0.88166	4
KDM6A	0.0031199	0.0018884	0.107421	356	-0.93616	6
TMEM179B	0.0031238	0.0015068	0.094088	357	-1.0527	3
UBIAD1	0.0031317	0.0018939	0.107421	358	-0.11693	3
C7orf55	0.0031395	0.0018939	0.107421	359	-1.2278	6
SMARCE1	0.0031395	0.0018939	0.107421	360	-1.4749	5
STT3B	0.0031413	0.0015128	0.094187	361	-0.95766	4
BAIAP2L2	0.0032068	0.0019336	0.108764	362	-0.23452	3
PGD	0.0032591	0.001659	0.100154	363	-1.1956	5
CSNK1E	0.0032591	0.001659	0.100154	364	-1.0794	4
RPS29	0.0032958	0.001633	0.100154	365	-0.82278	3
HK3	0.0033027	0.0016595	0.100154	366	-0.83449	4
UBL7	0.0033065	0.0020767	0.108764	367	-0.40616	5
NDUFB9	0.0033065	0.0020767	0.108764	368	-1.2913	5
LGALS14	0.0033118	0.0020767	0.108764	369	-0.43665	5
TEX22	0.0033293	0.0016595	0.100154	370	-0.68003	5
MRPS26	0.0033486	0.0020991	0.108764	371	-0.61924	4
TTC25	0.003351	0.0020991	0.108764	372	-0.8238	4
CACNA1G	0.0033532	0.0021036	0.108764	373	-0.013713	3
PYGO2	0.0034088	0.0021562	0.108764	374	-0.71654	6
ZC3H4	0.0034161	0.0021562	0.108764	375	-0.99027	6
SELL	0.0034228	0.0021562	0.108764	376	-0.6246	6
DEFB131	0.0034389	0.0021562	0.108764	377	-0.72249	5
OBFC1	0.003441	0.0017033	0.10195	378	-1.0249	5
TONSL	0.0034525	0.0017033	0.10195	379	-0.89519	5
MLLT6	0.0034569	0.0021562	0.108764	380	-0.30554	3
ZNF334	0.0034638	0.0021562	0.108764	381	-0.17319	3
STAB2	0.0034744	0.0016416	0.100154	382	-0.8173	4
TADA3	0.0034761	0.0021566	0.108764	383	-1.5785	6
CUTA	0.0034761	0.0021566	0.108764	384	-1.7973	5
C1orf210	0.0034773	0.0021566	0.108764	385	-0.44602	5
TTF1	0.0034918	0.0021566	0.108764	386	-1.6251	6
CHST1	0.0035057	0.0017335	0.102369	387	-0.6123	4
PRMT6	0.0035066	0.0021566	0.108764	388	-0.41042	3
DARS2	0.0035192	0.0021566	0.108764	389	-0.39102	5
COX6B1	0.0035218	0.0017335	0.102369	390	-1.0798	5
EIF2AK1	0.0035297	0.0017339	0.102369	391	-0.3711	2
RAD51C	0.0035332	0.0017339	0.102369	392	-0.72377	5
TOX	0.0035463	0.0021566	0.108764	393	-0.47771	6
C1QL1	0.0035506	0.0017339	0.102369	394	-0.70216	4
CCL16	0.0035589	0.0022147	0.108764	395	-1.156	5
LSM11	0.0035679	0.0022147	0.108764	396	-0.84347	6
USP37	0.0035793	0.0017513	0.103113	397	-0.49528	4
FAM83F	0.0035914	0.002222	0.108764	398	-0.94588	5
MMP9	0.0036299	0.0022224	0.108764	399	-0.14545	3
VPS37B	0.0036342	0.0022224	0.108764	400	-0.89126	4
RABL2B	0.0036535	0.0014337	0.092453	401	-0.73612	3
CAPN14	0.0036783	0.0022786	0.108764	402	-0.2918	4
hsa-mir-3916	0.0036815	0.0014575	0.09288	403	-1.4138	3
LIMS2	0.0036856	0.0017933	0.105017	404	-1.3333	5
GCOM1	0.0037068	0.0022978	0.108764	405	-0.54444	6
MRPL35	0.0037181	0.0022983	0.108764	406	-1.7075	5
GJC2	0.0037354	0.0023252	0.108764	407	-0.81461	6
LHX3	0.0037405	0.0023252	0.108764	408	-0.22747	4
NTN1	0.0037497	0.0023257	0.108764	409	-0.82856	6
CINP	0.0037587	0.0019917	0.108764	410	-1.0166	5
UBE2D4	0.0037639	0.002031	0.108764	411	-0.60292	5
PDE1C	0.0037748	0.0023472	0.108764	412	-0.46015	6
ABHD11	0.0037873	0.0023476	0.108764	413	-0.64685	5
IQSEC3	0.0037917	0.0020314	0.108764	414	-0.54877	4
EXOSC5	0.0037989	0.0023476	0.108764	415	-1.3055	6
PLEKHA8	0.0038076	0.0023536	0.108764	416	-0.76282	5
XRCC2	0.0038099	0.0020314	0.108764	417	-2.2012	5
CAMK2G	0.0038349	0.0023691	0.108764	418	-1.4753	6
MTG2	0.0038352	0.0013739	0.092254	419	-2.0168	2
CCDC64	0.0038465	0.0023696	0.108764	420	-0.73389	5
CNKSR2	0.0038567	0.0023723	0.108764	421	-0.79753	5
MCF2	0.0038798	0.0020904	0.108764	422	-0.71234	5
MOCS3	0.0038845	0.0023787	0.108764	423	-1.3834	4
NFASC	0.0038845	0.0023787	0.108764	424	-1.0695	5
DIABLO	0.0038845	0.0023787	0.108764	425	-1.0166	4
TTC30B	0.003885	0.0023787	0.108764	426	-0.71192	6
OTOP2	0.0038889	0.0020904	0.108764	427	-0.70145	4
SFPQ	0.0039025	0.0019684	0.108764	428	-0.85891	4
ROMO1	0.0039064	0.0023792	0.108764	429	-1.6212	4
GTF3C5	0.0039065	0.0023792	0.108764	430	-1.4291	4
PTTG1	0.0039102	0.0020904	0.108764	431	-0.80268	4
SEC11C	0.0039406	0.0023842	0.108764	432	-1.105	4
MRPL22	0.0039455	0.0023863	0.108764	433	-0.61767	6
SPPL2C	0.003956	0.0020908	0.108764	434	-0.8806	5
IST1	0.0039618	0.0023883	0.108764	435	-0.81023	6
CMPK1	0.0039772	0.0019866	0.108764	436	-0.94091	4
QRSL1	0.0039795	0.0023888	0.108764	437	-0.70649	4
CSTF1	0.004002	0.0020968	0.108764	438	-1.1108	4
N6AMT1	0.0040021	0.0020968	0.108764	439	-0.84677	5
MOGAT3	0.0040134	0.0023988	0.108764	440	-0.79543	5
GRSF1	0.0040171	0.0023988	0.108764	441	-1.6747	5
G6PC2	0.0040734	0.0021534	0.108764	442	-0.79688	4
NEK8	0.0040824	0.0019871	0.108764	443	-0.51385	2
ETAA1	0.0040913	0.0021539	0.108764	444	-0.35005	4
RPRD2	0.004126	0.0021863	0.108764	445	-0.69704	3
INPP1	0.0041498	0.0024834	0.108764	446	-0.37711	5
KCNB2	0.00419	0.0024916	0.108764	447	-0.80856	6
YTHDF3	0.0042346	0.0025016	0.108764	448	-0.91474	5
DRG1	0.0042469	0.0025199	0.108764	449	-0.71189	6
RPS17	0.0042651	0.0025199	0.108764	450	-0.68446	6
DRAXIN	0.0042726	0.0022366	0.108764	451	-0.6367	3
ERLIN2	0.0042913	0.0025204	0.108764	452	-0.76982	6
METTL23	0.0043117	0.0025204	0.108764	453	-0.72652	6
C17orf62	0.004317	0.0022371	0.108764	454	-0.25195	3
HAGHL	0.0043193	0.0022371	0.108764	455	-0.87585	5
NAIF1	0.0043203	0.0022371	0.108764	456	-0.99736	4
GALNT6	0.0043346	0.0022371	0.108764	457	-0.73502	4
SMC1A	0.0043406	0.0025396	0.108764	458	-1.3953	5
HAS2	0.0043406	0.0025396	0.108764	459	-0.90455	5
AKIRIN2	0.0043471	0.00254	0.108764	460	-0.89663	6
C19orf67	0.0043475	0.0022371	0.108764	461	-1.0014	4
GJC1	0.0043535	0.0022371	0.108764	462	-0.74977	4
HIST1H1A	0.0043631	0.002254	0.108764	463	-0.2571	2
TIMM13	0.0043774	0.0024678	0.108764	464	-0.85891	2
RPL38	0.0043826	0.002254	0.108764	465	-1.0958	4
GLUL	0.0044222	0.0022544	0.108764	466	-0.70026	3
FPGS	0.0044553	0.0022764	0.108764	467	-0.3522	4
GTSF1L	0.0044768	0.002599	0.109929	468	-0.67189	6
DNAJC2	0.0044876	0.0023394	0.108764	469	-0.98836	5
ZSCAN18	0.0044881	0.002503	0.108764	470	-0.82744	3
DYSF	0.0045008	0.0026278	0.109929	471	-0.60004	6
SAR1B	0.0045014	0.0023394	0.108764	472	-0.5069	3
GOLGA6C	0.0045033	0.002503	0.108764	473	-0.77142	3
TMEM194A	0.0045098	0.0026278	0.109929	474	-0.73989	5
NUP37	0.0045274	0.0023394	0.108764	475	-0.88906	5
RUVBL2	0.0045317	0.0026383	0.109929	476	-0.97213	5
ATP1A3	0.0045372	0.0023399	0.108764	477	-0.74303	5
SLAMF7	0.0045651	0.0023399	0.108764	478	-0.61935	5
SND1	0.0045786	0.0026506	0.109929	479	-0.69382	5
ZNF461	0.0045825	0.0026506	0.109929	480	-0.63288	6
DPPA3	0.0045933	0.0023486	0.108764	481	-0.59239	4
POLD2	0.0046198	0.002349	0.108764	482	-0.84364	3
MAFG	0.0046254	0.0026588	0.109929	483	-0.93462	4
TTYH1	0.0046314	0.002349	0.108764	484	-0.72488	5
QDPR	0.0046427	0.0023824	0.108764	485	-0.39959	2
SNX16	0.0046481	0.0026789	0.109929	486	-0.83722	6
C19orf25	0.0046548	0.0024431	0.108764	487	-0.75797	4
LOC100862671	0.0046622	0.0026789	0.109929	488	-0.47093	5
CYTH3	0.0046712	0.0026789	0.109929	489	-0.83736	6
NDUFA1	0.0046712	0.0026789	0.109929	490	-0.73607	6
ZMYND11	0.0046771	0.0024431	0.108764	491	-1.0958	4
ORC5	0.004678	0.0026789	0.109929	492	-0.73101	5
CCDC102B	0.0046807	0.0026794	0.109929	493	-0.41252	3
ATP6V0A4	0.0046857	0.0024431	0.108764	494	-0.48354	4
TRMT10A	0.0047	0.0024431	0.108764	495	-1.3275	5
HABP4	0.0047004	0.0024431	0.108764	496	-0.65529	5
HCCS	0.0047318	0.0024436	0.108764	497	-0.62618	5
WFDC9	0.004736	0.0026885	0.109929	498	-0.31537	4
OR9A2	0.0047775	0.002689	0.109929	499	-0.4349	6
ZNF37A	0.0047817	0.002689	0.109929	500	-0.7271	5
CYCS	0.0047966	0.002689	0.109929	501	-1.1074	5
CTAG1A	0.0047996	0.0024738	0.108764	502	-0.73853	5
SATB2	0.0048105	0.002689	0.109929	503	-0.96241	5
ESF1	0.0048105	0.002689	0.109929	504	-1.0671	5
IP6K1	0.0048245	0.0024943	0.108764	505	-0.95429	5
RNPC3	0.0048341	0.0027315	0.111056	506	-1.3447	3
ASS1	0.004839	0.0024943	0.108764	507	-0.75049	3
NARFL	0.0048466	0.0028855	0.114698	508	-0.69227	5
C3orf83	0.0048545	0.0028855	0.114698	509	-0.46983	6
MBD2	0.0048681	0.0027319	0.111056	510	-0.85891	3
THOC7	0.0048909	0.0027319	0.111056	511	-0.85891	4
SHOX2	0.004893	0.0024943	0.108764	512	-0.63391	5
WASH1	0.0049122	0.0024948	0.108764	513	-1.2351	4
C9orf131	0.0049122	0.0024948	0.108764	514	-1.0246	5
RRAGA	0.0049122	0.0024948	0.108764	515	-1.3151	4
C19orf52	0.0049128	0.0024948	0.108764	516	-1.0227	4
RBBP5	0.0049252	0.0024948	0.108764	517	-0.91856	5
PSMB7	0.0049305	0.0027895	0.113185	518	-0.85891	4
XBP1	0.004976	0.0024948	0.108764	519	-1.7076	5
INTS7	0.004985	0.0029111	0.114698	520	-0.77359	5
CCDC84	0.0049928	0.0029115	0.114698	521	-0.52026	4
CALY	0.0050124	0.0029115	0.114698	522	0.080441	2
MRPS23	0.0050148	0.0025062	0.108764	523	-1.1922	5
RLTPR	0.0050177	0.0029115	0.114698	524	-0.67182	4
CHSY1	0.0050178	0.0029115	0.114698	525	-0.43163	5
KRTAP5-2	0.0050325	0.0025144	0.108764	526	-0.62955	5
hsa-mir-4688	0.0050476	0.0015311	0.095052	527	-1.5824	2
RASD1	0.0050512	0.0025144	0.108764	528	-0.71094	3
DUSP3	0.0050649	0.0025144	0.108764	529	-0.78155	5
FAM122B	0.0050677	0.002997	0.115175	530	-0.80345	6
ARHGAP20	0.005069	0.0025149	0.108764	531	-0.66145	5
C16orf78	0.0050816	0.0029974	0.115175	532	-0.80591	5
LRP11	0.0050911	0.0030185	0.115175	533	-1.1251	4
IDH3A	0.0051045	0.0030253	0.115175	534	-0.52594	5
RPS19BP1	0.0051109	0.0025332	0.108764	535	-1.0944	5
ZNF707	0.0051145	0.0030253	0.115175	536	-0.55988	6
ZNF385B	0.0051468	0.0025336	0.108764	537	-0.69325	4
ALCAM	0.005149	0.0030258	0.115175	538	-0.50833	5
STX5	0.005169	0.0030258	0.115175	539	-1.1136	6
H2AFZ	0.0051704	0.0025725	0.109929	540	-1.2088	4
SMO	0.0052077	0.0030386	0.115175	541	-0.51145	6
2025-09-07	0.0052116	0.0025903	0.109929	542	-0.91928	4
EIF5A	0.0052175	0.0030386	0.115175	543	-1.6302	5
PNPT1	0.0052369	0.0029074	0.114698	544	-0.85891	4
TMEM11	0.0052406	0.0026479	0.109929	545	-0.78599	5
PUS10	0.0052406	0.0026479	0.109929	546	-0.92494	5
PCM1	0.0052591	0.0030632	0.115188	547	-0.58015	6
SNX33	0.0052622	0.0029074	0.114698	548	-0.85891	3
hsa-let-7e	0.0053273	0.0022471	0.108764	549	-2.3261	3
RFX3	0.0053331	0.0030756	0.115188	550	-0.72839	5
AMZ1	0.0053377	0.0030984	0.115188	551	-0.67997	6
TSEN2	0.005346	0.0030984	0.115188	552	-1.0722	5
SLC39A14	0.0053584	0.0028288	0.113944	553	-0.67717	5
F8A3	0.0053605	0.00099869	0.086554	554	-0.70011	1
ASB8	0.005363	0.0031236	0.115188	555	-0.2963	3
SLC30A8	0.0053659	0.0031236	0.115188	556	-0.49283	5
SMIM19	0.0053679	0.0031236	0.115188	557	-0.97746	6
MTMR14	0.0053698	0.0031236	0.115188	558	-0.92253	5
TAF1C	0.0053827	0.003124	0.115188	559	-1.1629	6
ZNF319	0.0053884	0.003124	0.115188	560	-0.78309	4
SLC35D2	0.0054096	0.0029079	0.114698	561	-0.55233	3
GRK5	0.0054159	0.003129	0.115188	562	-0.62601	6
UTP14A	0.0054164	0.0028293	0.113944	563	-0.73925	5
RNASEH1	0.0054227	0.0028293	0.113944	564	-0.82704	3
RNF208	0.0054801	0.0028572	0.114698	565	-0.62401	4
KLRG2	0.0054884	0.0029083	0.114698	566	-0.70419	4
DEFB106A	0.0055067	0.0029591	0.115175	567	-0.5235	4
RAB43	0.0055089	0.0033776	0.119958	568	-0.79957	6
LRRC37A2	0.0055097	0.0033776	0.119958	569	-0.47673	4
MDM1	0.0055132	0.0029595	0.115175	570	-0.67039	5
TCL1B	0.0055203	0.0033781	0.119958	571	-1.1219	5
KAZALD1	0.0055315	0.0033891	0.119958	572	-0.42638	4
NDUFA6	0.0055477	0.002949	0.115175	573	-1.081	3
RALYL	0.0055591	0.0034736	0.119958	574	-0.71696	4
FAM96B	0.0055639	0.0029801	0.115175	575	-2.0301	3
CNKSR3	0.0055639	0.0029801	0.115175	576	-0.80372	4
MYB	0.0055639	0.0029801	0.115175	577	-0.93908	3
CHORDC1	0.0055828	0.0029801	0.115175	578	-1.1516	5
DOT1L	0.0055959	0.0029801	0.115175	579	-0.88407	5
LIG4	0.0055974	0.0034823	0.119958	580	-0.15797	4
DMP1	0.0056089	0.0034827	0.119958	581	-0.75668	5
HELQ	0.0056212	0.0029805	0.115175	582	-0.56123	3
IQCF5	0.0056303	0.0034914	0.119958	583	-1.1285	6
PATE1	0.0056384	0.0029956	0.115175	584	-0.70201	2
ALAS2	0.0056487	0.0034919	0.119958	585	-0.42736	5
TSSC4	0.0056585	0.0035152	0.119958	586	-0.57487	4
hsa-mir-4420	0.0056735	0.0024765	0.108764	587	-1.2866	3
TMEM221	0.005683	0.0035156	0.119958	588	-0.49091	3
GATA2	0.0057067	0.0030454	0.115175	589	-1.29	5
NFRKB	0.0057119	0.0030454	0.115175	590	-0.95315	4
NDUFA10	0.0057307	0.0035371	0.119958	591	-0.46413	4
EIF2B5	0.005745	0.0030459	0.115175	592	-0.22455	3
hsa-mir-200c	0.0057599	0.0017696	0.103907	593	-1.5663	2
XRN1	0.0057695	0.0035481	0.119958	594	-0.70501	5
INTS10	0.0057813	0.0035485	0.119958	595	-1.0868	6
SACM1L	0.0057813	0.0035485	0.119958	596	-1.1911	6
NDUFAF7	0.0057813	0.0035485	0.119958	597	-1.4319	5
PAGE2	0.0057859	0.0035485	0.119958	598	-0.39221	5
LRMP	0.0058369	0.0035604	0.119958	599	-0.95744	6
TRAPPC2L	0.0058371	0.0031524	0.115188	600	-0.01134	2
PHF11	0.0058412	0.0035604	0.119958	601	-0.68019	5
NHP2L1	0.0058522	0.003034	0.115175	602	-0.70512	4
BCLAF1	0.0058964	0.0035609	0.119958	603	-0.87004	6
THRSP	0.0059167	0.0035609	0.119958	604	-1.2879	4
HEPACAM2	0.0059205	0.0035755	0.119958	605	-0.49161	5
GOLGA6L1	0.0059255	0.003092	0.115188	606	-1.2725	4
SLC7A9	0.005992	0.0031734	0.115188	607	-0.75661	4
RAB24	0.0059972	0.003576	0.119958	608	-0.9888	5
MRPS28	0.0060068	0.003576	0.119958	609	-0.76566	5
PFDN1	0.0060075	0.003576	0.119958	610	-1.2231	5
STOM	0.006011	0.0031734	0.115188	611	-0.7727	4
IL1F10	0.006011	0.0031734	0.115188	612	-0.70021	4
LSMEM2	0.0060137	0.0031734	0.115188	613	-0.36903	2
REM1	0.006016	0.003576	0.119958	614	-0.78011	4
MTERFD1	0.0060212	0.0031734	0.115188	615	-0.38445	2
NKG7	0.0060451	0.003576	0.119958	616	-0.45588	5
ATP8B2	0.0060673	0.003576	0.119958	617	-0.37523	4
PER1	0.0060673	0.0031734	0.115188	618	-0.22863	3
BRD4	0.006074	0.0035942	0.119958	619	-0.77622	5
FAM216A	0.0060827	0.0032643	0.118076	620	-0.55224	4
MZB1	0.0060834	0.0032643	0.118076	621	-0.70895	4
TBCE	0.0060963	0.0031738	0.115188	622	-0.78842	5
SNRNP25	0.0061428	0.003613	0.119958	623	-1.3605	5
C9orf139	0.0061627	0.0031738	0.115188	624	-0.90544	4
MUSK	0.0061627	0.0031738	0.115188	625	-0.70542	4
RPP38	0.0061627	0.0031738	0.115188	626	-1.1312	4
SPTLC3	0.0061686	0.003613	0.119958	627	-0.24345	4
GIP	0.0061903	0.0031738	0.115188	628	-0.82506	5
TIMM8A	0.006212	0.003613	0.119958	629	0.017923	3
PSTPIP1	0.0062662	0.0036134	0.119958	630	-0.7668	5
LCN8	0.0062663	0.0026383	0.109929	631	-0.85891	3
TGIF2	0.0062728	0.003353	0.119958	632	-0.69009	4
SPDL1	0.0063142	0.0035499	0.119958	633	-0.86819	4
TAF7	0.0063176	0.0036134	0.119958	634	-0.59573	5
SLC2A7	0.0063322	0.0036134	0.119958	635	-1.1878	5
KIF6	0.0063481	0.0036134	0.119958	636	-0.6018	6
PRPF31	0.0063544	0.0035595	0.119958	637	-0.77522	4
MRGBP	0.0063839	0.0036591	0.119958	638	-0.46092	6
ICT1	0.0063933	0.0036596	0.119958	639	-0.2341	5
HJURP	0.0064009	0.0035595	0.119958	640	-1.2139	5
CCDC60	0.0064236	0.00356	0.119958	641	-0.56585	3
USP1	0.0064292	0.00356	0.119958	642	-1.4702	4
CCDC113	0.006433	0.00356	0.119958	643	-0.82606	4
BRD8	0.0064339	0.00356	0.119958	644	-0.70547	5
UQCRB	0.0064354	0.00356	0.119958	645	-1.8011	3
KMT2D	0.0064485	0.0037272	0.12005	646	-0.89547	5
AHCY	0.0064513	0.0037272	0.12005	647	-0.63271	5
ERCC3	0.0064678	0.00356	0.119958	648	-0.61881	5
GCNT1	0.0064787	0.0037272	0.12005	649	-0.34567	5
LTC4S	0.0064814	0.0035865	0.119958	650	-0.62578	4
CHMP6	0.0064833	0.0035865	0.119958	651	-0.47467	3
IRF8	0.0064943	0.0028073	0.113695	652	-0.85891	2
NUBP1	0.0065303	0.0036244	0.119958	653	-0.44187	3
FABP3	0.0065388	0.0037569	0.12005	654	-0.89811	5
PES1	0.006569	0.0037569	0.12005	655	-2.0195	5
NRF1	0.0065831	0.0035033	0.119958	656	-0.93693	3
AP5Z1	0.0066157	0.0036372	0.119958	657	-0.74412	4
PFKL	0.006617	0.0036372	0.119958	658	-0.55649	4
LPAR5	0.0066195	0.0036372	0.119958	659	-0.34361	3
SDHB	0.0066252	0.0035229	0.119958	660	-0.53037	3
UBL5	0.0066326	0.0036372	0.119958	661	-1.5904	5
USP17L11	0.0066351	0.0037569	0.12005	662	-0.27676	5
CIRBP	0.0066693	0.0037569	0.12005	663	-0.22988	4
IPO5	0.0066699	0.0036678	0.120046	664	-0.80477	4
CTDNEP1	0.0066999	0.0037569	0.12005	665	-2.1677	6
OR5T3	0.0067581	0.0037574	0.12005	666	-0.029992	3
LIPN	0.0067653	0.0037574	0.12005	667	-0.66194	5
HPS6	0.0068038	0.0037574	0.12005	668	-1.1201	5
IL31	0.0068121	0.0037574	0.12005	669	-0.69637	5
KANSL3	0.0068158	0.0037574	0.12005	670	-0.084261	3
TRAF3	0.0068312	0.0039251	0.122654	671	-0.51397	4
GLDN	0.006843	0.0039904	0.123178	672	-0.72946	4
KDM3B	0.0068623	0.0035476	0.119958	673	-0.85891	4
ACAP1	0.0068882	0.0037761	0.12005	674	-0.46483	5
TDRP	0.0068938	0.0040654	0.123381	675	-0.64889	4
UCKL1	0.0069071	0.0037761	0.12005	676	-0.39115	4
COL6A1	0.006912	0.0040658	0.123381	677	-0.87563	4
VPS29	0.0069453	0.0037894	0.12005	678	-0.88976	5
UGT2B7	0.006953	0.0037894	0.12005	679	-0.49638	5
LAIR1	0.006971	0.0043235	0.129047	680	-0.92911	5
NEB	0.0069931	0.0037898	0.12005	681	-0.79767	5
hsa-mir-8080	0.0069933	0.0036504	0.119958	682	0.087016	2
NDUFB5	0.0069953	0.004324	0.129047	683	-0.99972	4
NONO	0.0070041	0.0037898	0.12005	684	-0.55574	6
HCRT	0.0070268	0.0037898	0.12005	685	-0.6557	6
TFR2	0.007044	0.0038634	0.122095	686	-0.64952	5
hsa-mir-6131	0.0070503	0.0036509	0.119958	687	-1.1153	4
EDC4	0.0070603	0.0038821	0.122095	688	-1.1215	6
TXN2	0.0071048	0.0038826	0.122095	689	-0.52504	5
COL27A1	0.0071088	0.0039452	0.122654	690	-0.19963	3
MAT2A	0.0071481	0.0036929	0.12005	691	-0.85891	4
CDHR3	0.0071484	0.0039452	0.122654	692	-0.45595	5
APCDD1L	0.0071621	0.0039452	0.122654	693	-2.6231	6
ADPGK	0.007166	0.0039452	0.122654	694	-0.92018	4
PRSS1	0.0071695	0.0043587	0.129538	695	-0.63305	5
PLIN4	0.0071934	0.0039456	0.122654	696	-0.50289	5
VPS37C	0.0071955	0.0039456	0.122654	697	-1.0398	5
RANBP9	0.0072002	0.0039456	0.122654	698	-1.7809	5
FGF22	0.0072189	0.0043692	0.129538	699	-0.37943	3
CDK5R1	0.0072432	0.0043697	0.129538	700	-0.9703	4
ZNF454	0.0072809	0.0040416	0.123178	701	-0.44065	5
IGSF6	0.0073128	0.0040416	0.123178	702	-0.8774	5
HEPHL1	0.0073396	0.0040416	0.123178	703	-0.97358	4
hsa-mir-6513	0.0073684	0.003745	0.12005	704	-1.5756	4
DBN1	0.0073861	0.0045187	0.129538	705	-0.73461	5
ZNF860	0.0073876	0.0045187	0.129538	706	-0.81609	5
MRPL4	0.0073916	0.0040416	0.123178	707	-0.80236	5
SFR1	0.0073995	0.0045187	0.129538	708	-1.2662	4
FGG	0.0074209	0.0040421	0.123178	709	-1.2369	4
AGXT2L2	0.0074418	0.0040421	0.123178	710	-0.094238	3
ZNF878	0.0074457	0.0045191	0.129538	711	-0.75655	5
COL16A1	0.0074473	0.0045191	0.129538	712	-0.40472	3
NPM1	0.0074731	0.0032977	0.119084	713	-1.245	3
MRGPRX2	0.0074933	0.0045479	0.129538	714	-0.69086	3
FBF1	0.0075254	0.0040421	0.123178	715	-0.18658	4
hsa-mir-6081	0.0075414	0.0040174	0.123178	716	-1.3553	4
B3GALT1	0.0075443	0.0040421	0.123178	717	-0.58201	6
hsa-mir-1258	0.0075446	0.0040357	0.123178	718	-1.6262	4
SLC25A31	0.0075453	0.0040357	0.123178	719	-0.72889	4
NEU3	0.0075521	0.0040421	0.123178	720	-0.33644	4
ZNF236	0.0075678	0.0040421	0.123178	721	-0.48258	5
PPAN	0.007591	0.0040562	0.123381	722	-0.40556	6
FAM110B	0.007596	0.0048673	0.129538	723	-0.74579	4
LILRB4	0.0076312	0.0048673	0.129538	724	-0.081659	3
RPL9	0.0076647	0.0048678	0.129538	725	-0.8846	5
KCNC2	0.007668	0.0041239	0.123941	726	-1.5037	6
HIST1H2BC	0.0076772	0.0048678	0.129538	727	-0.054529	3
PPP1R2	0.007696	0.004881	0.129538	728	-0.77528	4
TMEM202	0.0077007	0.004881	0.129538	729	-0.82952	4
PKMYT1	0.0077097	0.0041239	0.123941	730	-0.85671	6
FBXO42	0.0077114	0.0041239	0.123941	731	-0.54492	6
XRCC4	0.0077348	0.004881	0.129538	732	-0.75818	4
KLKB1	0.0077429	0.004881	0.129538	733	-0.9088	5
HHLA3	0.0077521	0.0041083	0.123941	734	-0.71115	4
KIF2C	0.007753	0.0041243	0.123941	735	-1.7152	6
NDUFB2	0.0077531	0.004881	0.129538	736	-0.94677	5
SLC44A4	0.0077691	0.0048815	0.129538	737	-0.44168	4
AKT1S1	0.0077784	0.0041243	0.123941	738	-1.4915	5
EMR2	0.0078278	0.0041243	0.123941	739	0.057903	3
FRMD8	0.0078303	0.0041508	0.124406	740	-0.72243	5
DAZL	0.0078329	0.0048815	0.129538	741	-0.95817	4
ZNF665	0.0078364	0.0036381	0.119958	742	-0.85891	3
NHLRC2	0.0078437	0.0041513	0.124406	743	-0.6712	5
EEF1G	0.0078467	0.0048975	0.129538	744	-0.68006	4
TEPP	0.0078468	0.0048975	0.129538	745	-0.66582	3
BRI3	0.0078521	0.0041673	0.124713	746	-0.85891	4
TUBB	0.0078793	0.0048979	0.129538	747	-0.82708	5
DAZAP1	0.0079281	0.0043999	0.129538	748	-0.83845	5
PSCA	0.0079382	0.0043999	0.129538	749	-0.60955	4
C17orf77	0.0079529	0.0049144	0.129538	750	-0.059641	2
GPAA1	0.0079785	0.004457	0.129538	751	-0.79816	5
OR4F16	0.0079793	0.0049144	0.129538	752	-0.60143	4
COL10A1	0.0079802	0.0049144	0.129538	753	-0.79572	5
PLXND1	0.0079932	0.004457	0.129538	754	-0.21675	3
CAPZA2	0.0080032	0.004457	0.129538	755	-0.7955	5
ZNF816	0.0080162	0.004457	0.129538	756	-1.0748	5
ZNF254	0.0080296	0.0049555	0.130463	757	-0.7295	5
TYW1	0.0080502	0.004457	0.129538	758	-0.54014	5
hsa-mir-628	0.0080685	0.0038775	0.122095	759	-1.4968	3
PPP1R12A	0.0080744	0.0049816	0.130685	760	-0.96011	4
ZNF451	0.008097	0.0043574	0.129538	761	-0.67169	4
OXCT1	0.0081039	0.004982	0.130685	762	-0.73195	5
LAMTOR1	0.0081177	0.004982	0.130685	763	-0.37332	2
PAX2	0.0081236	0.0044574	0.129538	764	-0.77554	5
ALKBH4	0.0081586	0.0044574	0.129538	765	-0.13693	3
KIAA1199	0.0081812	0.0044574	0.129538	766	-0.94711	6
DDX55	0.0081924	0.0050177	0.13146	767	-0.76039	5
hsa-mir-3124	0.0082056	0.003878	0.122095	768	-0.5546	2
COX20	0.0082286	0.005046	0.131896	769	-1.0769	4
TPRN	0.0082333	0.0044081	0.129538	770	-0.85891	2
GNAQ	0.0082473	0.0050465	0.131896	771	-0.70938	4
CACFD1	0.0082494	0.0044574	0.129538	772	-0.86441	4
SLC25A26	0.008288	0.0044085	0.129538	773	-0.87758	4
hsa-mir-7849	0.0082919	0.0044085	0.129538	774	-0.55761	3
MYL5	0.0083049	0.0050606	0.131948	775	-0.44129	3
TP53TG5	0.008324	0.0045246	0.129538	776	-0.773	4
NDUFS2	0.0083525	0.0050903	0.132245	777	-0.89443	5
USP17L8	0.0083603	0.0044085	0.129538	778	-0.68054	4
WASL	0.0083636	0.0050903	0.132245	779	-0.87162	4
CYP2E1	0.0083641	0.0045251	0.129538	780	-1.5704	5
HIST1H2BL	0.0083778	0.0050903	0.132245	781	-0.37883	3
RASIP1	0.0083791	0.0045251	0.129538	782	-0.24427	5
NAALADL1	0.0084342	0.0045251	0.129538	783	-1.5672	5
ITPR1	0.0084434	0.0046375	0.129538	784	0.024517	3
OSTF1	0.0084893	0.0046375	0.129538	785	-0.6798	5
MRPS17	0.0084906	0.0046375	0.129538	786	-0.64806	4
MMP23B	0.0084906	0.0046375	0.129538	787	-0.52859	5
PDK2	0.0084906	0.0046375	0.129538	788	-0.8419	5
ZC2HC1C	0.0085193	0.0046375	0.129538	789	-1.5273	6
TJAP1	0.0085489	0.0046379	0.129538	790	-0.78634	5
PGF	0.0085679	0.0046379	0.129538	791	-0.21081	5
ARFRP1	0.0085717	0.0046379	0.129538	792	-1.0719	5
DAK	0.0085899	0.0045936	0.129538	793	-0.68494	4
SRSF11	0.0085981	0.0046379	0.129538	794	-0.60686	4
SH3KBP1	0.0086016	0.0051036	0.13243	795	-0.72755	4
PCSK1N	0.0086402	0.0046553	0.129538	796	-0.52444	4
LOC100130539	0.0086541	0.0046553	0.129538	797	-0.14435	3
EXOG	0.0086571	0.0051177	0.132639	798	-0.7523	3
GADD45GIP1	0.0086755	0.0051456	0.133202	799	-0.64908	4
GRM7	0.0087002	0.0046558	0.129538	800	-0.51721	4
F12	0.0087002	0.0046558	0.129538	801	-0.63866	4
EFTUD1	0.0087076	0.0051817	0.133499	802	-1.1998	5
C7orf26	0.0087144	0.0046558	0.129538	803	-1.0843	4
DACT3	0.0087327	0.0047439	0.129538	804	-1.2214	6
KLHDC2	0.0087355	0.0047439	0.129538	805	-0.21627	3
DPYSL2	0.0087648	0.004823	0.129538	806	0.25041	2
CTSG	0.0087799	0.0048692	0.129538	807	-0.4321	5
NSRP1	0.0087844	0.0046146	0.129538	808	-0.58722	3
METAP1	0.0087917	0.0048692	0.129538	809	-0.14756	3
SRGAP1	0.0087984	0.0052594	0.134575	810	-0.84862	5
MTNR1A	0.0088005	0.0048692	0.129538	811	-0.76408	6
CENPM	0.0088031	0.0046146	0.129538	812	-0.68685	4
NUP62	0.0088185	0.0048692	0.129538	813	-0.62595	5
hsa-mir-1288	0.0088579	0.0046146	0.129538	814	-2.4394	4
PGAP3	0.0088579	0.0046146	0.129538	815	-0.85891	3
NDUFB11	0.0088691	0.0046146	0.129538	816	-0.64859	2
C17orf64	0.0088703	0.0048692	0.129538	817	-1.0611	5
FNTB	0.0088703	0.0048692	0.129538	818	-0.47901	4
GAREML	0.0088703	0.0048692	0.129538	819	-0.44583	5
LOC100652824	0.0088739	0.0048692	0.129538	820	-0.52794	3
FAM118B	0.0088836	0.005327	0.134575	821	-0.75437	5
SCO2	0.008889	0.0048696	0.129538	822	-1.0095	5
SMC6	0.008889	0.0048696	0.129538	823	-0.84811	5
SLC25A22	0.0088982	0.0048696	0.129538	824	-0.55328	5
OR52K2	0.0089459	0.0053554	0.134575	825	-0.56802	4
ZNF891	0.0089636	0.0053554	0.134575	826	-0.0974	2
DROSHA	0.0089648	0.0053554	0.134575	827	-0.73966	5
SENP6	0.0089648	0.0053554	0.134575	828	-1.0259	5
ERBB2	0.0089664	0.0048002	0.129538	829	-0.65769	2
SYTL3	0.0089745	0.0048002	0.129538	830	-0.85891	2
ALKBH7	0.0089809	0.0048696	0.129538	831	-0.24583	3
ADD3	0.0089999	0.0049071	0.129538	832	-0.58582	6
DAGLB	0.0090048	0.0048002	0.129538	833	-0.69987	4
ALKBH2	0.009071	0.0049071	0.129538	834	-0.31436	4
FAM92B	0.009081	0.0049071	0.129538	835	-0.4574	5
MTIF2	0.0090933	0.0049071	0.129538	836	-0.83372	6
YARS	0.0091329	0.0053805	0.134575	837	-2.0868	4
VPS13D	0.009137	0.0053805	0.134575	838	-0.79799	5
ISX	0.0091405	0.0049075	0.129538	839	-1.1654	5
MRPL33	0.0091423	0.0049075	0.129538	840	-0.66851	5
SKIV2L2	0.0091451	0.0053805	0.134575	841	-0.80232	5
CHMP1A	0.0091472	0.0053805	0.134575	842	-0.80594	4
RIF1	0.0091571	0.0049075	0.129538	843	-0.98856	5
ZNF562	0.0091728	0.0049075	0.129538	844	-0.59569	5
SERF2	0.0091875	0.0048006	0.129538	845	-0.85891	4
DOCK8	0.0091931	0.005396	0.134575	846	-0.0031051	2
SEC24A	0.009218	0.005396	0.134575	847	-0.73893	4
SLC35A5	0.0092382	0.0051726	0.133499	848	-0.66656	5
PODXL	0.0092606	0.005211	0.133969	849	-0.92487	5
MRPL11	0.009291	0.0054819	0.135345	850	-1.1909	5
DLL3	0.0093047	0.0048006	0.129538	851	-0.85891	3
GARS	0.0093309	0.0053965	0.134575	852	-0.7873	3
KRT32	0.0093315	0.0053965	0.134575	853	-0.68331	5
MTX1	0.0093422	0.0053965	0.134575	854	-0.85873	4
CCDC58	0.0093468	0.0048591	0.129538	855	-0.68842	2
MCM2	0.0093672	0.0053965	0.134575	856	-0.93815	4
SLC45A1	0.0093707	0.0054824	0.135345	857	-0.45722	4
SMOC2	0.0093909	0.0054824	0.135345	858	-0.41458	4
GPATCH1	0.0093974	0.0054824	0.135345	859	-0.2415	4
ZCCHC9	0.0094086	0.0053965	0.134575	860	-0.84498	5
SRCIN1	0.0094258	0.0054824	0.135345	861	-0.19541	4
EPB41L5	0.0094351	0.0055153	0.135345	862	-0.25919	3
FRMD5	0.0094408	0.0050551	0.131948	863	-0.66665	4
MCAM	0.0094686	0.0055153	0.135345	864	-0.60164	5
MAL2	0.0094791	0.0055158	0.135345	865	-0.76998	5
KRTAP19-5	0.0095024	0.0055158	0.135345	866	-0.75873	5
DPH1	0.0095178	0.0055158	0.135345	867	-0.70707	5
CD207	0.0095445	0.00555	0.135382	868	-0.44014	4
IZUMO2	0.009604	0.00555	0.135382	869	-0.44555	5
FKBP10	0.0096056	0.00555	0.135382	870	-0.73768	6
CD52	0.0096063	0.0054276	0.135171	871	-0.64986	3
LOC152586	0.0096522	0.0054627	0.135345	872	-0.88228	4
SPINK6	0.0096594	0.0055505	0.135382	873	-0.39728	6
LAMP1	0.0096997	0.0056446	0.135751	874	-0.49889	4
LGALS3BP	0.0097011	0.0056446	0.135751	875	0.46148	2
PCBP2	0.0097017	0.0056446	0.135751	876	-1.2137	6
C17orf72	0.0097141	0.0056003	0.135751	877	-0.44241	4
PTGER3	0.0097163	0.0052123	0.133969	878	-0.85891	2
SPC24	0.0097445	0.0056181	0.135751	879	-2.0253	4
FAM49B	0.0097561	0.0056446	0.135751	880	-0.67942	5
C2orf91	0.0097904	0.0056451	0.135751	881	-0.9417	5
LENG1	0.0097904	0.0056451	0.135751	882	-1.0374	6
PPP2R5E	0.0097904	0.0056451	0.135751	883	-0.80409	5
VAMP8	0.0097962	0.0056451	0.135751	884	-1.5615	5
CLHC1	0.0097985	0.0056446	0.135751	885	-0.83936	5
IVD	0.009849	0.0057369	0.137807	886	-0.36388	5
LRRC1	0.0098816	0.005954	0.141764	887	-0.87758	4
ZNF182	0.0099348	0.0052877	0.134575	888	-0.7739	3
HIST1H4G	0.0099549	0.0059841	0.142142	889	-0.63027	5
COL13A1	0.0099552	0.0060285	0.142142	890	-0.055227	3
CPSF7	0.0099763	0.0060289	0.142142	891	-0.52032	6
CNTLN	0.0099917	0.0060289	0.142142	892	-0.77254	4
CBLC	0.0099958	0.0059846	0.142142	893	-0.83335	5
NDEL1	0.0099974	0.0055605	0.135382	894	-0.73333	3
HNRNPCL1	0.010015	0.0060289	0.142142	895	-0.50563	4
RNASEH2B	0.010038	0.0060289	0.142142	896	-0.81783	5
ANAPC11	0.010038	0.006002	0.142142	897	-0.64407	4
STXBP2	0.010049	0.0052992	0.134575	898	-0.91208	3
hsa-mir-877	0.010081	0.005561	0.135382	899	-1.9656	3
REEP4	0.010091	0.0060234	0.142142	900	-0.80295	5
GJD2	0.010098	0.0060568	0.142165	901	-0.58898	5
RPS21	0.010118	0.0052996	0.134575	902	-1.09	3
RAF1	0.010134	0.0052996	0.134575	903	-0.74533	4
C10orf25	0.010141	0.0060819	0.142165	904	-0.60073	4
ARIH1	0.010164	0.0060769	0.142165	905	-1.3409	4
PTGES3L-AARSD1	0.010186	0.0051813	0.133499	906	-2.4385	2
GNGT1	0.010187	0.0060824	0.142165	907	-1.4756	4
IPO11	0.010193	0.0060824	0.142165	908	-0.44895	5
HPX	0.010196	0.0060824	0.142165	909	-0.24543	4
SFTA2	0.010207	0.0052996	0.134575	910	-0.70001	3
hsa-mir-6864	0.010213	0.0052996	0.134575	911	-1.9925	4
hsa-mir-1976	0.01022	0.0058023	0.138915	912	-2.3621	3
PARN	0.010233	0.0052996	0.134575	913	-0.85891	3
AIF1L	0.010237	0.0061176	0.142834	914	-0.5196	5
hsa-mir-4497	0.010259	0.0052996	0.134575	915	-2.6728	3
WDR12	0.010279	0.0061372	0.143138	916	-1.0746	5
C20orf96	0.01034	0.0066326	0.148388	917	-1.1155	5
NPEPL1	0.01034	0.0066326	0.148388	918	-0.51822	4
KRT26	0.01036	0.0061875	0.144089	919	-0.62356	3
CLECL1	0.010362	0.0066563	0.148388	920	-0.5683	5
hsa-mir-27a	0.010379	0.0051813	0.133499	921	-0.85891	1
BCL2	0.010386	0.0066563	0.148388	922	-0.64226	5
ATP5I	0.010386	0.0062108	0.144089	923	-0.59096	3
SDE2	0.010447	0.0062113	0.144089	924	-0.47809	5
ZG16B	0.010449	0.0055135	0.135345	925	-0.75716	4
CLP1	0.010463	0.0055135	0.135345	926	-0.85891	4
SOX12	0.01047	0.0062844	0.144803	927	-0.96617	4
CMTM8	0.010485	0.0062848	0.144803	928	-0.67988	5
KIAA1244	0.010492	0.0066563	0.148388	929	-0.71233	5
NMU	0.010502	0.0063017	0.144803	930	-0.69002	5
hsa-mir-3689a	0.010503	0.0055413	0.135382	931	-1.2277	3
CRISP3	0.010516	0.0063017	0.144803	932	-0.76168	5
GRAMD2	0.010526	0.0063017	0.144803	933	-1.1921	5
PCDHGA1	0.010528	0.0066568	0.148388	934	-0.12856	4
MRPL34	0.01054	0.0063017	0.144803	935	-1.0301	4
AIM2	0.010545	0.0063017	0.144803	936	-0.7429	4
LEMD3	0.010563	0.0057831	0.138608	937	-1.0188	4
C1orf64	0.01057	0.0063022	0.144803	938	-0.81065	5
ACMSD	0.010582	0.0066568	0.148388	939	-0.29473	4
IKBIP	0.010592	0.0066568	0.148388	940	-0.74828	6
LGALS1	0.010597	0.0063022	0.144803	941	-0.37377	5
C21orf59	0.010609	0.0058384	0.139625	942	-0.91793	4
PPDPF	0.010648	0.0063447	0.145341	943	-0.74253	5
CAND1	0.010664	0.0066943	0.148774	944	-1.0486	6
USP33	0.010692	0.0066947	0.148774	945	-0.053021	3
hsa-mir-4512	0.010729	0.0086048	0.161709	946	-1.605	3
NDC1	0.01073	0.0066947	0.148774	947	-1.1443	4
CEP170B	0.010751	0.0067486	0.149217	948	-0.49003	5
MRPL47	0.010753	0.0063707	0.145341	949	-0.61464	3
GREM1	0.010759	0.0067486	0.149217	950	-0.7407	5
PLA2G2D	0.010795	0.0063707	0.145341	951	-1.0877	5
C8orf34	0.010799	0.0063707	0.145341	952	-0.58743	4
SHOC2	0.010826	0.0063707	0.145341	953	-0.75641	5
OR8I2	0.010833	0.0067491	0.149217	954	-0.86484	6
ANXA8L1	0.010837	0.0086053	0.161709	955	-0.99133	2
ATAD3A	0.010847	0.0068464	0.150917	956	-0.67995	5
PRAP1	0.010863	0.0068469	0.150917	957	-1.4084	4
USP7	0.010889	0.0058845	0.140275	958	-0.85891	3
hsa-mir-7107	0.01091	0.0053974	0.134575	959	-1.2589	2
DISP2	0.01092	0.0069908	0.152652	960	-0.6872	4
TECR	0.010969	0.0063927	0.145341	961	-0.59429	5
SPRY2	0.010982	0.0070342	0.152652	962	-1.0465	6
SDR9C7	0.010982	0.0070342	0.152652	963	-0.71355	4
YME1L1	0.010982	0.0063927	0.145341	964	-0.75736	4
SLCO2B1	0.010991	0.0063927	0.145341	965	-0.77761	5
OLFML2A	0.01101	0.0063927	0.145341	966	-0.61389	3
TDRD12	0.011014	0.0063927	0.145341	967	-0.68133	5
TRPS1	0.011022	0.0070342	0.152652	968	-0.47504	5
CHCHD4	0.011036	0.0070562	0.152652	969	-0.19264	4
RABGGTA	0.011036	0.005885	0.140275	970	-0.85891	4
PTK6	0.011057	0.005885	0.140275	971	-0.72222	4
NBPF1	0.011062	0.0070731	0.152652	972	-1.3919	6
CACNG4	0.011068	0.0070731	0.152652	973	-1.5107	6
TUBGCP5	0.011077	0.0070731	0.152652	974	-0.24839	4
MMD	0.011108	0.0070735	0.152652	975	-0.62636	4
LOC100129361	0.011129	0.0070735	0.152652	976	-0.80257	5
MED29	0.011132	0.0070735	0.152652	977	-0.36127	4
GTDC1	0.011139	0.0064251	0.145478	978	-0.82236	5
TTC4	0.011141	0.0074035	0.152686	979	-0.41596	6
LOC100287399	0.011159	0.0064256	0.145478	980	-0.37332	5
HOXC5	0.011167	0.0064256	0.145478	981	-0.65199	4
KCNQ2	0.011209	0.0074039	0.152686	982	-0.70177	6
SSTR3	0.01122	0.0074478	0.152686	983	-0.59025	4
SP7	0.011228	0.0064256	0.145478	984	-0.83099	4
MOCS1	0.011233	0.0074478	0.152686	985	-0.69097	4
CUL2	0.011242	0.0074478	0.152686	986	-1.4959	5
UPK3BL	0.011253	0.0074478	0.152686	987	-0.49081	5
HIST1H2BH	0.011259	0.0074478	0.152686	988	-0.43915	5
TUBB8	0.011299	0.0074478	0.152686	989	-1.1004	6
KDM6B	0.011303	0.0065101	0.147238	990	0.0932	2
CCDC33	0.011332	0.0074482	0.152686	991	-0.51349	5
RCN1	0.011347	0.0074482	0.152686	992	-0.83193	5
SCARA5	0.011347	0.0065951	0.148386	993	-0.61365	4
TBC1D3	0.011352	0.0074482	0.152686	994	-0.12043	5
EVPLL	0.011373	0.006644	0.148388	995	-0.63226	5
TMEM150B	0.011399	0.0067258	0.149158	996	-0.87809	4
MLYCD	0.011406	0.0067258	0.149158	997	-0.58061	3
hsa-mir-4780	0.011431	0.0089928	0.162212	998	-1.7414	2
hsa-mir-4424	0.011431	0.0089928	0.162212	999	-3.2288	3
BUD13	0.011432	0.0075017	0.152686	1000	-0.7698	5
SLC7A10	0.011432	0.0075017	0.152686	1001	-0.53564	5
PPP1R8	0.011441	0.006771	0.149549	1002	-1.5852	4
LGALS12	0.01147	0.0075022	0.152686	1003	-0.50662	6
BBS7	0.01147	0.0075022	0.152686	1004	-0.9558	5
GTPBP4	0.011486	0.0090458	0.162212	1005	-0.85891	3
MMD2	0.011496	0.0075479	0.152686	1006	-0.88854	5
PRMT1	0.011501	0.0075479	0.152686	1007	-0.54065	6
HIST3H2BB	0.011502	0.0075479	0.152686	1008	-2.2919	4
LAG3	0.011529	0.0060701	0.142165	1009	-0.85891	4
RPUSD3	0.011532	0.006877	0.151428	1010	-0.77629	4
HUS1	0.011548	0.0060701	0.142165	1011	-0.85891	3
ZNF830	0.011574	0.0075479	0.152686	1012	-0.54669	5
ATIC	0.011624	0.0069972	0.152652	1013	-0.03134	3
DHPS	0.011626	0.0075483	0.152686	1014	-0.89635	5
FAM117A	0.011658	0.0075483	0.152686	1015	-0.61868	6
HIPK2	0.011706	0.0069977	0.152652	1016	-0.68443	4
KMT2B	0.011716	0.0069977	0.152652	1017	-0.26585	3
LOC100129636	0.011717	0.0075483	0.152686	1018	-0.91523	5
PRR11	0.011724	0.0075483	0.152686	1019	-0.66626	4
FAM98B	0.011738	0.0070224	0.152652	1020	-0.7748	4
MALSU1	0.011757	0.0075483	0.152686	1021	-1.1028	6
NAE1	0.011761	0.0070224	0.152652	1022	-0.96449	4
LRP3	0.011765	0.0070224	0.152652	1023	-0.97258	4
LSM14B	0.01177	0.0075483	0.152686	1024	-0.73263	5
SMARCB1	0.011771	0.0070224	0.152652	1025	-1.1263	4
MRPS30	0.011789	0.0090462	0.162212	1026	-0.85891	3
EIF3H	0.011791	0.0075671	0.152686	1027	-0.70324	4
CHMP2A	0.011805	0.0070228	0.152652	1028	-0.63042	5
KLF13	0.01184	0.0075671	0.152686	1029	-1.2696	5
FDXR	0.011859	0.0075675	0.152686	1030	-2.6498	5
DNPH1	0.011865	0.0075675	0.152686	1031	-0.76498	6
LRRC43	0.011867	0.0075675	0.152686	1032	-0.70141	4
ZCCHC6	0.011899	0.0090974	0.162365	1033	-0.85891	2
BSG	0.01192	0.0075675	0.152686	1034	-0.69554	5
C16orf59	0.011956	0.0076086	0.152686	1035	-0.24537	5
KLF6	0.011984	0.0076086	0.152686	1036	-0.86959	6
EPRS	0.011989	0.0070822	0.152686	1037	-1.0032	4
GSPT1	0.012001	0.0090979	0.162365	1038	-1.0844	3
DCTN3	0.012026	0.0071233	0.152686	1039	-0.83648	4
CHST5	0.012027	0.0076086	0.152686	1040	-0.31369	4
IFITM3	0.012048	0.0071233	0.152686	1041	-0.73744	5
MNAT1	0.012052	0.0076086	0.152686	1042	-1.0987	5
CPAMD8	0.012063	0.0076086	0.152686	1043	-0.42011	5
MROH2B	0.012066	0.0076086	0.152686	1044	-0.40126	5
AURKAIP1	0.012082	0.0071238	0.152686	1045	-0.39017	4
TAZ	0.012086	0.0071613	0.152686	1046	-0.72751	4
MICB	0.012089	0.0071613	0.152686	1047	-0.8586	5
SPHK2	0.01212	0.0071617	0.152686	1048	-0.80592	5
MAP3K19	0.012122	0.0071617	0.152686	1049	-0.70784	4
NKX2-1	0.012128	0.0071617	0.152686	1050	-0.12134	2
TNFAIP2	0.012142	0.0062026	0.144089	1051	-0.85891	3
MRPS33	0.012151	0.0074409	0.152686	1052	-1.2355	5
NAGK	0.012186	0.0076091	0.152686	1053	-1.0174	5
GSTM5	0.012204	0.006203	0.144089	1054	-1.0397	3
BRINP2	0.012206	0.0074638	0.152686	1055	-0.51657	4
PHF12	0.012211	0.0076091	0.152686	1056	-0.83811	6
LGALS13	0.012247	0.0076525	0.152686	1057	-0.75585	6
PPP1R26	0.012269	0.0065174	0.14725	1058	-0.85891	3
LIPC	0.012273	0.0076525	0.152686	1059	-0.77583	4
H2AFB3	0.012274	0.0057456	0.137863	1060	-0.36522	1
NUP35	0.012285	0.009277	0.162365	1061	-0.83842	2
GALK1	0.012289	0.0076525	0.152686	1062	-0.89063	4
C8orf33	0.012324	0.0076525	0.152686	1063	-0.85265	6
VARS2	0.012341	0.0076525	0.152686	1064	-0.95422	4
DPM3	0.012352	0.0065745	0.148088	1065	-0.85891	3
PARP10	0.012356	0.007488	0.152686	1066	-0.58527	5
NIPSNAP3A	0.012414	0.0076525	0.152686	1067	-0.14251	4
SCP2	0.01242	0.0076525	0.152686	1068	-0.36494	5
P2RY2	0.012433	0.0074885	0.152686	1069	-0.80798	4
EHD2	0.012433	0.0074885	0.152686	1070	-0.6709	4
TAAR2	0.012433	0.0074885	0.152686	1071	-1.3902	4
KAT5	0.01244	0.0076525	0.152686	1072	-0.64389	5
DECR1	0.012494	0.0074885	0.152686	1073	-0.45558	3
ROBO2	0.012505	0.007653	0.152686	1074	-0.092618	4
C14orf169	0.012519	0.006575	0.148088	1075	-0.60033	4
MYT1L	0.012531	0.006575	0.148088	1076	-0.85891	3
MRM1	0.01254	0.0074885	0.152686	1077	-0.5478	3
AIFM3	0.012562	0.007653	0.152686	1078	-1.0233	5
GPS1	0.012577	0.007653	0.152686	1079	-0.74351	4
WDR3	0.01258	0.007653	0.152686	1080	-0.53547	5
CRYBA1	0.012586	0.0074885	0.152686	1081	0.123	2
CAPN8	0.012642	0.0093382	0.162365	1082	-0.85891	2
GAGE1	0.012688	0.007653	0.152686	1083	-0.038603	3
CAP1	0.012697	0.007653	0.152686	1084	-1.0459	5
hsa-mir-6831	0.0127	0.0096385	0.163034	1085	-1.3142	3
SCHIP1	0.012717	0.0096389	0.163034	1086	-0.6672	2
CENPA	0.012725	0.007653	0.152686	1087	-0.00075289	3
C14orf159	0.012762	0.0077617	0.154438	1088	-0.21247	3
DIRC2	0.01278	0.0077622	0.154438	1089	-0.15936	5
CDNF	0.012792	0.0077622	0.154438	1090	-0.23206	4
THOC5	0.012835	0.0078728	0.155153	1091	-0.27064	4
HEXB	0.012859	0.0078728	0.155153	1092	-0.47384	4
FAM193B	0.012906	0.0075488	0.152686	1093	-0.77495	5
LRWD1	0.012919	0.0078728	0.155153	1094	-0.61043	5
PHF23	0.01295	0.0075492	0.152686	1095	-0.40754	5
RALA	0.012952	0.0075492	0.152686	1096	-0.3233	3
ZBTB10	0.013023	0.0078732	0.155153	1097	-1.4161	5
hsa-mir-4513	0.013078	0.007186	0.152686	1098	-1.3375	4
UBA3	0.013092	0.007913	0.155153	1099	-0.29781	4
DFNA5	0.013104	0.0079701	0.155153	1100	-0.42183	4
CACNA1B	0.013121	0.0079706	0.155153	1101	-0.46258	4
KPNB1	0.013121	0.0079706	0.155153	1102	-0.78286	4
C1orf110	0.013176	0.0079345	0.155153	1103	-1.5054	6
VGLL2	0.013178	0.0080354	0.155182	1104	-0.63075	5
ZNHIT6	0.013198	0.007186	0.152686	1105	-0.85891	4
ABHD14B	0.013227	0.0080359	0.155182	1106	-0.60957	4
DTX4	0.013242	0.0079349	0.155153	1107	-0.40213	4
NME4	0.013251	0.0079349	0.155153	1108	-0.28247	6
C4orf19	0.013252	0.0079349	0.155153	1109	-0.27908	4
ABHD16A	0.013255	0.0071864	0.152686	1110	-0.85891	3
ADAM12	0.013263	0.0079349	0.155153	1111	-0.52119	6
NDUFAF6	0.013264	0.0080629	0.155564	1112	-0.64616	5
CD300C	0.013285	0.0079349	0.155153	1113	-0.63525	5
SERPINI2	0.013286	0.0079349	0.155153	1114	-0.40644	4
XCR1	0.013329	0.0079838	0.155153	1115	-0.47713	4
EIF4A3	0.013346	0.0071864	0.152686	1116	-0.85891	4
ANXA1	0.013366	0.0071864	0.152686	1117	-0.80158	4
ADAMTS10	0.013409	0.0079838	0.155153	1118	-0.4431	4
CYFIP2	0.013411	0.0079838	0.155153	1119	-0.6744	5
hsa-mir-6749	0.01345	0.0096983	0.163274	1120	-1.8058	3
CCDC167	0.013456	0.008274	0.157762	1121	-0.21519	2
GOLGA1	0.01347	0.0079843	0.155153	1122	-1.7827	5
ANXA2	0.013481	0.0079843	0.155153	1123	-0.69956	5
CABIN1	0.013487	0.0079843	0.155153	1124	-1.2543	5
KLHDC7B	0.013494	0.0079843	0.155153	1125	-0.59579	5
TMEM71	0.01351	0.0079843	0.155153	1126	-0.42846	5
hsa-mir-1184-1	0.013529	0.0072531	0.152686	1127	-0.97088	3
CABS1	0.01353	0.0079843	0.155153	1128	-0.63955	5
TP53I11	0.013537	0.0079843	0.155153	1129	-0.53855	6
TPPP	0.013537	0.0079843	0.155153	1130	-0.41989	4
MXRA5	0.013553	0.0083293	0.157762	1131	-0.54137	4
WNT5B	0.013584	0.0083293	0.157762	1132	-0.31069	2
DDX5	0.0136	0.0080295	0.155182	1133	-0.96725	4
HIST4H4	0.013663	0.00803	0.155182	1134	-0.84756	4
ERLIN1	0.013671	0.00803	0.155182	1135	-1.105	4
HNRNPLL	0.013674	0.00803	0.155182	1136	-0.90974	5
APBA1	0.013704	0.00803	0.155182	1137	-0.4771	6
MSI2	0.013735	0.0083297	0.157762	1138	-0.94111	5
SP3	0.013739	0.0081419	0.15654	1139	-0.58641	5
H2AFB1	0.013743	0.0099478	0.166568	1140	-0.93386	2
POLR1C	0.013789	0.0083297	0.157762	1141	-0.74899	5
DDX23	0.013804	0.0081424	0.15654	1142	-1.1247	5
CCL27	0.01381	0.0081424	0.15654	1143	-0.65069	6
IPO7	0.013811	0.0083297	0.157762	1144	-0.80445	4
CDT1	0.013835	0.0075077	0.152686	1145	-0.85891	3
CKS1B	0.013837	0.0081424	0.15654	1146	-0.4119	5
ZNF18	0.013878	0.0081675	0.156884	1147	-0.39737	6
COX15	0.014063	0.011214	0.172754	1148	-0.85891	3
C14orf93	0.014066	0.0085079	0.160166	1149	-0.39125	4
MXRA7	0.014072	0.011214	0.172754	1150	-0.67129	4
KRTAP27-1	0.014073	0.0083293	0.157762	1151	-0.22096	3
PRKRIR	0.014082	0.011214	0.172754	1152	-0.85891	4
hsa-mir-6775	0.01411	0.011297	0.173034	1153	-1.1913	3
hsa-mir-6850	0.014149	0.01001	0.1671	1154	-2.8501	2
BUD31	0.014208	0.011297	0.173034	1155	-0.85891	4
PAQR7	0.01423	0.0083297	0.157762	1156	-0.79068	4
IFNK	0.014237	0.0083297	0.157762	1157	-0.59455	4
KRT19	0.014251	0.0083297	0.157762	1158	-0.23068	3
SLC7A5	0.014317	0.0083297	0.157762	1159	-0.55011	5
CDKL3	0.014319	0.0083297	0.157762	1160	-0.67984	5
SPATA22	0.014319	0.0083297	0.157762	1161	-1.2302	5
BZW1	0.014324	0.0083297	0.157762	1162	0.1072	3
ACACA	0.014325	0.0085084	0.160166	1163	-0.65227	4
hsa-mir-588	0.014335	0.011298	0.173034	1164	-1.2247	3
LMO2	0.01434	0.0085084	0.160166	1165	-0.55147	4
GATC	0.014343	0.0085084	0.160166	1166	-0.73752	4
P2RX1	0.014368	0.0085084	0.160166	1167	-0.57614	5
hsa-mir-4295	0.014401	0.011298	0.173034	1168	-1.4091	4
RAD23B	0.014416	0.0085084	0.160166	1169	-0.58753	3
HYAL4	0.014426	0.0083297	0.157762	1170	-0.28325	4
SLC25A6_X	0.014426	0.0083297	0.157762	1171	-0.39252	5
DNAJB9	0.014435	0.0085084	0.160166	1172	-0.64494	3
GSDMA	0.014481	0.0088141	0.162212	1173	-0.16825	3
PDP1	0.014512	0.01001	0.1671	1174	-0.85891	3
MRPL44	0.01456	0.011357	0.173034	1175	-0.85891	4
MRPL27	0.014566	0.011357	0.173034	1176	-0.85891	4
RBM27	0.014582	0.011357	0.173034	1177	-0.73774	4
WTAP	0.014585	0.01001	0.1671	1178	-0.85891	3
ZC3H3	0.014586	0.011357	0.173034	1179	-0.91629	4
LRFN2	0.014591	0.0088141	0.162212	1180	0.41181	2
CASP10	0.014611	0.0088146	0.162212	1181	-0.58729	6
NDUFAF5	0.014641	0.011358	0.173034	1182	-0.85891	4
SMG7	0.014645	0.0088146	0.162212	1183	-0.25085	3
OR2J2	0.014671	0.0088913	0.162212	1184	-0.71635	4
OIP5	0.014719	0.0088146	0.162212	1185	-1.4352	6
PSMG1	0.014751	0.0088402	0.162212	1186	-0.64752	5
IL6	0.014751	0.0088402	0.162212	1187	-0.40083	4
FAM199X	0.014751	0.0088402	0.162212	1188	-1.1111	4
ZWINT	0.014773	0.0089293	0.162212	1189	-0.72425	4
RAD50	0.014792	0.0088406	0.162212	1190	-1.0792	6
NDUFB7	0.014823	0.0088607	0.162212	1191	-1.4167	6
MCTS1	0.014865	0.0088612	0.162212	1192	-0.4607	4
NISCH	0.014873	0.0089297	0.162212	1193	-1.1484	4
C2orf62	0.014904	0.011836	0.178594	1194	-0.85891	4
CCDC86	0.014919	0.0089644	0.162212	1195	-0.97276	3
NDUFA5	0.014928	0.0089644	0.162212	1196	-1.0223	5
PSKH1	0.014937	0.0088868	0.162212	1197	-0.54817	5
GADD45B	0.01499	0.0089644	0.162212	1198	-1.1409	4
SGSH	0.015012	0.0089644	0.162212	1199	-0.64149	6
METTL14	0.015015	0.0089644	0.162212	1200	-0.81055	5
HRK	0.015034	0.0089644	0.162212	1201	-0.31592	3
TAF1B	0.015036	0.0089644	0.162212	1202	-1.3173	6
hsa-mir-548f-3	0.015086	0.0086222	0.161886	1203	-3.2442	2
WDR41	0.015128	0.0089649	0.162212	1204	-0.9192	4
UBR3	0.015132	0.0089649	0.162212	1205	-0.64848	6
ATG16L1	0.01516	0.0089649	0.162212	1206	-1.0272	5
MRPS24	0.015193	0.0090513	0.162212	1207	-1.3963	4
hsa-mir-2681	0.015203	0.010145	0.16883	1208	-1.0229	2
PEBP1	0.01522	0.0089791	0.162212	1209	-0.8276	5
EWSR1	0.015248	0.0089937	0.162212	1210	-0.66321	3
hsa-mir-1257	0.015269	0.010145	0.16883	1211	-1.1141	3
CREBBP	0.015283	0.0093583	0.162365	1212	-0.86768	3
MRPS10	0.015283	0.0093583	0.162365	1213	-0.85484	4
HARS2	0.015295	0.0093583	0.162365	1214	-0.54276	3
ACADSB	0.015303	0.0090175	0.162212	1215	0.14467	1
RANBP3	0.015305	0.0090175	0.162212	1216	-0.65756	5
XPNPEP3	0.015369	0.0090175	0.162212	1217	-0.46606	4
NR1D1	0.015421	0.009452	0.162365	1218	-0.60892	5
ZNF141	0.015441	0.0090175	0.162212	1219	-0.84942	5
IDH3G	0.01546	0.012294	0.184987	1220	-0.60623	4
OST4	0.015568	0.012382	0.186171	1221	-0.88512	3
MRPL23	0.015577	0.0090175	0.162212	1222	-0.11132	3
ZNF324	0.015604	0.0094525	0.162365	1223	-0.49589	5
MAN2B2	0.015604	0.0094525	0.162365	1224	-0.7672	4
NADSYN1	0.015619	0.0090175	0.162212	1225	-0.50585	6
AHSA1	0.015619	0.0090175	0.162212	1226	-1.833	5
ARSK	0.015619	0.0090175	0.162212	1227	-0.48259	5
ID2	0.015619	0.0090175	0.162212	1228	-0.47432	4
DDX19B	0.015619	0.0094525	0.162365	1229	-0.90309	4
HNF1B	0.015638	0.0090175	0.162212	1230	-1.3508	6
SAE1	0.015656	0.0090175	0.162212	1231	-0.61497	6
SEMA4F	0.015687	0.0090179	0.162212	1232	0.22774	2
CRB3	0.015695	0.0095005	0.162365	1233	-0.64209	5
BSN	0.015728	0.0090179	0.162212	1234	-0.093415	3
FOXK2	0.015741	0.0095005	0.162365	1235	-0.60811	3
SUMO3	0.01575	0.0095864	0.163034	1236	-0.46358	3
CSF2RB	0.01576	0.012529	0.187876	1237	-0.81822	3
hsa-mir-4717	0.015775	0.012529	0.187876	1238	-1.1571	4
ZBED6CL	0.015788	0.010355	0.170625	1239	-0.56293	3
YAF2	0.015796	0.0090179	0.162212	1240	-0.014274	3
IFNE	0.015859	0.0090179	0.162212	1241	-0.056381	3
TPPP3	0.015878	0.0096805	0.163108	1242	-0.11902	3
hsa-mir-6825	0.015898	0.01253	0.187876	1243	-3.723	4
HEY2	0.015898	0.01253	0.187876	1244	-0.85891	3
NIF3L1	0.015906	0.0090179	0.162212	1245	-0.22095	5
PHOX2B	0.015924	0.0096805	0.163108	1246	-0.41204	2
AMBP	0.015944	0.0090179	0.162212	1247	-0.47213	5
TMEM132D	0.015951	0.0090179	0.162212	1248	-0.70735	4
hsa-mir-607	0.01596	0.010566	0.170741	1249	-1.0181	3
ALOXE3	0.015961	0.0090179	0.162212	1250	-0.38799	3
HSPA14	0.016035	0.009681	0.163108	1251	-0.6255	4
hsa-mir-140	0.016044	0.012606	0.188498	1252	-1.2422	4
SLC7A6OS	0.016045	0.009681	0.163108	1253	-1.4151	4
WBP4	0.016045	0.009681	0.163108	1254	-0.668	5
CFL1	0.016074	0.0090179	0.162212	1255	-0.27654	4
UGT2B17	0.016074	0.012606	0.188498	1256	-0.79098	4
MTFR1L	0.01609	0.0090472	0.162212	1257	-0.48491	5
CHEK1	0.016108	0.0097888	0.164422	1258	-1.0179	5
hsa-mir-4306	0.016122	0.012606	0.188498	1259	-2.7185	4
PLA2G4B	0.016155	0.0090476	0.162212	1260	-0.47381	5
HIF1A	0.01618	0.0090476	0.162212	1261	-0.49734	4
SYT13	0.016183	0.0091614	0.162365	1262	-1.1127	5
EEF1A2	0.016256	0.0091619	0.162365	1263	-0.10888	3
2025-09-02	0.016258	0.012606	0.188498	1264	-0.66329	3
TNNT2	0.016264	0.0091619	0.162365	1265	-0.74752	5
AGAP4	0.016298	0.0091619	0.162365	1266	-0.25063	3
CNOT6L	0.016303	0.0091911	0.162365	1267	-0.64057	5
CYB5R1	0.016335	0.0097893	0.164422	1268	-0.49405	3
PSMC5	0.016338	0.0097893	0.164422	1269	-1.4106	4
RNF222	0.016341	0.0091916	0.162365	1270	-0.40608	4
AIP	0.016359	0.0091916	0.162365	1271	-0.81427	4
METTL3	0.016381	0.0092446	0.162365	1272	-1.0215	5
SLC9B2	0.016392	0.012697	0.189734	1273	-0.85891	4
CDH12	0.016399	0.0092446	0.162365	1274	-0.36971	5
TRPV1	0.016414	0.0092446	0.162365	1275	-0.26178	5
TCEAL5	0.016427	0.0098391	0.164875	1276	-0.78418	4
PPIL4	0.016453	0.009245	0.162365	1277	-0.26181	3
PAPL	0.016458	0.0098391	0.164875	1278	-0.6852	3
ACER1	0.016471	0.009245	0.162365	1279	-0.40574	5
LDOC1L	0.016475	0.009245	0.162365	1280	-0.40037	5
PLA2G15	0.016483	0.009245	0.162365	1281	-1.0005	5
CHID1	0.016485	0.0098391	0.164875	1282	-0.73259	4
hsa-mir-548o	0.016516	0.011079	0.172754	1283	-1.7123	3
PDSS1	0.016552	0.01108	0.172754	1284	-0.79131	3
OR11H4	0.016563	0.0092999	0.162365	1285	-1.1243	5
NOL8	0.016579	0.012951	0.193264	1286	-0.85891	3
OR2A4	0.016617	0.0092999	0.162365	1287	-1.2601	4
OR4F29	0.016618	0.0070507	0.152652	1288	-0.82793	1
SPRED3	0.016638	0.013035	0.194371	1289	-0.85891	4
OR13A1	0.016645	0.0093273	0.162365	1290	-0.43452	5
HSPA4	0.016665	0.0093273	0.162365	1291	-0.61629	5
MRPL42	0.016704	0.0093277	0.162365	1292	-0.77496	3
SFXN2	0.016765	0.0094164	0.162365	1293	-0.49527	5
2025-09-03	0.016774	0.01029	0.170363	1294	-0.57212	5
MCM3	0.01679	0.01029	0.170363	1295	-0.76743	3
HTATSF1	0.016791	0.01029	0.170363	1296	-0.50714	5
PCDH12	0.016826	0.0094164	0.162365	1297	-0.094187	3
MED16	0.016836	0.0094164	0.162365	1298	0.043873	3
PPM1D	0.01685	0.0094164	0.162365	1299	-1.0491	6
FAM193A	0.016891	0.0094164	0.162365	1300	-0.34699	6
CLCN3	0.016894	0.0094164	0.162365	1301	-0.1956	3
SNRNP200	0.016909	0.01065	0.170805	1302	-0.67217	4
SLC44A2	0.016915	0.0094164	0.162365	1303	-0.52289	4
AIFM2	0.016923	0.01359	0.202511	1304	-0.67831	3
DRAP1	0.016942	0.0094168	0.162365	1305	-1.206	4
VPS16	0.017001	0.0094168	0.162365	1306	-0.7152	5
MS4A1	0.017009	0.0094168	0.162365	1307	-0.59508	6
P2RX3	0.017047	0.0094168	0.162365	1308	-0.69864	6
QPRT	0.017062	0.0094168	0.162365	1309	-0.47638	3
POLR3C	0.017084	0.0094168	0.162365	1310	-0.6581	5
WHSC1	0.017088	0.0094168	0.162365	1311	-0.56891	5
PER2	0.017104	0.0094826	0.162365	1312	-1.7262	5
COL25A1	0.017111	0.01104	0.172754	1313	-0.87402	4
DCTD	0.017135	0.0094826	0.162365	1314	-0.43725	5
MTX2	0.017153	0.011041	0.172754	1315	-0.66661	4
SGCA	0.017156	0.0094826	0.162365	1316	-0.7713	5
INTS3	0.017158	0.013676	0.203518	1317	-0.9351	4
EIF2S3	0.017165	0.013676	0.203518	1318	-0.88766	4
TEX19	0.017165	0.0094826	0.162365	1319	-0.81073	4
HNRNPK	0.017185	0.011041	0.172754	1320	-1.2625	5
HRCT1	0.017187	0.0094826	0.162365	1321	-0.60924	5
CTCF	0.017191	0.0094826	0.162365	1322	-0.48864	5
DENR	0.0172	0.0094831	0.162365	1323	-0.63676	5
SRGAP2D	0.017216	0.011041	0.172754	1324	-0.8044	4
RNF11	0.017231	0.0094831	0.162365	1325	-0.75252	4
ATF6	0.01725	0.0094831	0.162365	1326	-0.85823	5
STX11	0.017281	0.0094831	0.162365	1327	-1.0701	5
DUSP1	0.017293	0.011097	0.172754	1328	-0.52922	4
VWA5B2	0.017295	0.011097	0.172754	1329	-1.3234	4
ERMAP	0.017296	0.0094831	0.162365	1330	-0.82661	6
NFS1	0.017344	0.0095165	0.162365	1331	-0.68218	6
PDCD11	0.017369	0.013792	0.205104	1332	-0.42533	1
IFNAR2	0.017383	0.0095165	0.162365	1333	0.40249	2
RABGGTB	0.017387	0.011098	0.172754	1334	-1.1398	4
METTL2A	0.017413	0.0095169	0.162365	1335	-0.48941	5
UBR4	0.017438	0.0095169	0.162365	1336	-0.32934	6
FAR2	0.017495	0.01566	0.231461	1337	-0.75819	4
PHKG2	0.017531	0.009612	0.163034	1338	-0.67702	4
INO80E	0.017566	0.01566	0.231461	1339	-0.43929	3
COA4	0.017596	0.015661	0.231461	1340	-0.76521	4
HSD17B12	0.017602	0.0096124	0.163034	1341	-0.35039	3
RSPO4	0.017647	0.015661	0.231461	1342	-0.92494	4
SYNDIG1	0.017667	0.015661	0.231461	1343	-0.42861	5
LRRC72	0.017669	0.0096371	0.163034	1344	-1.0878	5
TEX29	0.017677	0.0096371	0.163034	1345	-1.0782	5
MED15	0.017679	0.015661	0.231461	1346	-0.87255	4
MARK2	0.017682	0.0096371	0.163034	1347	-0.92368	5
CDHR2	0.01769	0.0096371	0.163034	1348	-0.70178	5
EIF3C	0.017706	0.0096376	0.163034	1349	-0.71613	5
MTERFD3	0.01772	0.0096376	0.163034	1350	-0.69589	6
hsa-mir-4484	0.017742	0.01187	0.178855	1351	-1.2407	3
UBOX5	0.017749	0.015781	0.232116	1352	-0.42793	2
CRLS1	0.017749	0.015781	0.232116	1353	-0.64193	5
hsa-mir-4322	0.017779	0.01187	0.178855	1354	-2.3634	2
SDHAF1	0.017795	0.010084	0.168077	1355	-0.6669	5
KNG1	0.017811	0.010084	0.168077	1356	-0.67454	4
HIST1H2BG	0.017838	0.015839	0.232116	1357	-0.83152	5
ZNF333	0.017851	0.010214	0.16984	1358	-0.69769	5
GCNT3	0.017856	0.010272	0.170363	1359	-0.42108	6
NXN	0.017867	0.015839	0.232116	1360	-0.84934	4
SNRPA	0.017886	0.015839	0.232116	1361	-0.98597	4
IGFLR1	0.017904	0.015839	0.232116	1362	-0.74467	5
CLDN20	0.017905	0.015839	0.232116	1363	-0.80365	4
PLIN1	0.017912	0.010331	0.170363	1364	-0.69514	5
GJD3	0.017931	0.015839	0.232116	1365	0.026617	2
RPA2	0.017953	0.015839	0.232116	1366	-1.1427	5
ZRSR2	0.017955	0.010331	0.170363	1367	-0.51041	5
AKAP11	0.018004	0.015839	0.232116	1368	-0.82718	4
VSTM2A	0.018012	0.010332	0.170363	1369	-0.538	4
SETD6	0.018013	0.010332	0.170363	1370	-0.56015	5
EIF4A1	0.018044	0.010332	0.170363	1371	-0.48624	5
RPL28	0.018068	0.010332	0.170363	1372	-0.78063	5
ACYP1	0.018081	0.015896	0.232116	1373	-0.64627	4
MTO1	0.018094	0.010332	0.170363	1374	-0.20636	4
TCEB2	0.018099	0.014889	0.221116	1375	-0.85891	4
KRT79	0.018155	0.015896	0.232116	1376	-0.58397	4
PQBP1	0.018166	0.010446	0.170741	1377	0.16046	2
DNAJC16	0.01817	0.010446	0.170741	1378	-0.57484	5
PCTP	0.018219	0.010447	0.170741	1379	-0.19908	3
HMGCLL1	0.018223	0.010447	0.170741	1380	-0.63189	6
ZFP112	0.018244	0.015896	0.232116	1381	-0.6054	3
MYL1	0.018244	0.015896	0.232116	1382	-0.70597	3
GPC2	0.01825	0.010447	0.170741	1383	-0.61795	4
KLF14	0.018258	0.010447	0.170741	1384	-0.12687	5
TSKS	0.018313	0.010514	0.170741	1385	-0.36337	5
FCRL2	0.018324	0.015897	0.232116	1386	-0.46548	4
TSPAN3	0.01834	0.010514	0.170741	1387	-0.82277	4
ANKRD34C	0.018349	0.010514	0.170741	1388	-0.87253	6
TNKS1BP1	0.018364	0.010514	0.170741	1389	-0.68232	5
EMP3	0.018364	0.010514	0.170741	1390	-0.73004	4
RHPN1	0.018376	0.010514	0.170741	1391	-0.65818	5
CCT8	0.018385	0.015897	0.232116	1392	-0.46145	3
GZMM	0.018405	0.010514	0.170741	1393	-0.56633	5
OSTN	0.018422	0.010572	0.170741	1394	-0.48492	5
IRF2	0.018425	0.010572	0.170741	1395	-0.46643	5
SYT2	0.018465	0.015897	0.232116	1396	-0.70848	3
ERBB2IP	0.018493	0.010572	0.170741	1397	-0.75614	5
TM4SF18	0.018544	0.010572	0.170741	1398	-0.43286	5
KNDC1	0.018568	0.010572	0.170741	1399	-0.52042	5
GTF3C6	0.018569	0.015951	0.232348	1400	-0.70315	4
ARRDC4	0.018586	0.010572	0.170741	1401	-0.24961	3
RPL5	0.018595	0.010572	0.170741	1402	-0.89344	5
C8orf59	0.018627	0.015951	0.232348	1403	-0.63385	5
NRARP	0.018641	0.010572	0.170741	1404	-0.26058	4
ATP10D	0.018663	0.010572	0.170741	1405	-0.61817	5
RPL14	0.018666	0.012837	0.191684	1406	-0.84754	2
KCNJ1	0.018673	0.010572	0.170741	1407	-0.65382	5
FARS2	0.018712	0.01601	0.232348	1408	-0.69253	5
FAIM3	0.018725	0.010638	0.170741	1409	-0.66655	5
GOSR2	0.018743	0.01601	0.232348	1410	-0.67064	4
GGN	0.01875	0.010638	0.170741	1411	-0.14373	4
LMBRD2	0.018751	0.010638	0.170741	1412	-0.33329	5
NAP1L4	0.018759	0.010638	0.170741	1413	-1.1065	5
ODC1	0.018765	0.01601	0.232348	1414	-0.5528	4
XDH	0.018783	0.010638	0.170741	1415	-0.33304	5
KRTAP5-3	0.018797	0.01601	0.232348	1416	-1.0887	4
TRAPPC2	0.018801	0.010638	0.170741	1417	-0.61179	6
B3GNTL1	0.018855	0.01601	0.232348	1418	-0.95353	4
PDE6B	0.018864	0.015086	0.223888	1419	-0.69931	3
MGST3	0.018881	0.010638	0.170741	1420	-0.86807	6
EAPP	0.018901	0.01601	0.232348	1421	-0.42033	4
CNOT2	0.018914	0.010638	0.170741	1422	-0.67195	5
GOLT1B	0.018934	0.016122	0.233816	1423	-0.84479	4
DEPTOR	0.018967	0.016186	0.234429	1424	-0.58279	4
PRSS38	0.018975	0.016186	0.234429	1425	-0.70547	4
KTI12	0.018987	0.010638	0.170741	1426	-0.42673	4
MAN2A1	0.019012	0.016299	0.234429	1427	-0.50938	3
AP1B1	0.019014	0.010638	0.170741	1428	-0.2769	4
COX6A1	0.019025	0.016299	0.234429	1429	-0.54424	4
ATG2A	0.01905	0.010638	0.170741	1430	-0.51374	4
RPS15A	0.019066	0.0163	0.234429	1431	-0.85891	4
POLDIP2	0.019071	0.0163	0.234429	1432	-0.90197	3
DLX2	0.019078	0.011019	0.172754	1433	-0.51418	5
TTC27	0.019078	0.011019	0.172754	1434	-1.7616	4
TMEM30A	0.019078	0.011019	0.172754	1435	-0.9033	5
LEPREL2	0.019101	0.0163	0.234429	1436	-0.73844	4
RNF7	0.019132	0.011019	0.172754	1437	-0.86713	5
SUSD5	0.019187	0.011019	0.172754	1438	0.19109	3
TNFSF4	0.019193	0.011019	0.172754	1439	-0.41265	6
FBXO2	0.019208	0.011019	0.172754	1440	-0.51576	5
HCLS1	0.01924	0.016412	0.234429	1441	-0.76885	3
SLC35G3	0.019242	0.011019	0.172754	1442	0.2446	3
TRAPPC3	0.019262	0.011019	0.172754	1443	-1.3796	5
ATP11A	0.019282	0.011019	0.172754	1444	-0.73259	5
CHCHD2	0.019286	0.016412	0.234429	1445	-0.75236	4
TSPAN13	0.019298	0.016412	0.234429	1446	-0.72119	4
SLC16A14	0.019363	0.016478	0.234429	1447	-0.74889	4
H3F3A	0.019398	0.01102	0.172754	1448	-0.71908	3
GPR56	0.019427	0.015898	0.232116	1449	-0.64354	4
ZNF831	0.019427	0.01102	0.172754	1450	-0.70139	5
SNX24	0.019427	0.01102	0.172754	1451	-0.59391	5
C3orf43	0.019427	0.01102	0.172754	1452	-0.83993	5
SUGP1	0.019427	0.01102	0.172754	1453	-0.57315	4
ZFP37	0.019427	0.01102	0.172754	1454	-1.4516	5
PCDP1	0.019427	0.01102	0.172754	1455	-0.64569	5
C16orf58	0.019435	0.016478	0.234429	1456	-0.55229	4
HSF2BP	0.019435	0.01102	0.172754	1457	-0.45372	4
SOX21	0.01946	0.016478	0.234429	1458	-0.80756	5
TMEM50A	0.019499	0.016478	0.234429	1459	-0.83156	4
FGF18	0.019499	0.016478	0.234429	1460	-1.0248	3
USP9X	0.019499	0.016478	0.234429	1461	-0.71806	4
PRSS56	0.019516	0.01102	0.172754	1462	-0.45394	5
BCS1L	0.019539	0.016478	0.234429	1463	-1.5063	4
SPNS1	0.019541	0.016225	0.234429	1464	-0.62617	3
ATP1B2	0.019579	0.016478	0.234429	1465	-0.45476	3
CT45A1	0.019587	0.016478	0.234429	1466	-0.35304	3
hsa-mir-148b	0.019598	0.016312	0.234429	1467	-1.5897	3
NDUFV2	0.019617	0.016478	0.234429	1468	-0.69698	3
KDM5A	0.019631	0.016313	0.234429	1469	-0.45844	2
SERPINB6	0.019662	0.016478	0.234429	1470	-0.96572	5
LGR6	0.019667	0.016361	0.234429	1471	-0.5905	3
FAM171A1	0.019704	0.016361	0.234429	1472	-0.48907	2
SLC17A2	0.019734	0.011082	0.172754	1473	-0.25339	4
CPSF3	0.019751	0.011082	0.172754	1474	-1.6005	5
STOML2	0.019806	0.011082	0.172754	1475	-0.70909	6
SFXN1	0.019812	0.011082	0.172754	1476	-0.2887	4
RASL12	0.019827	0.011082	0.172754	1477	-0.67578	5
hsa-mir-548a-3	0.019855	0.01646	0.234429	1478	-1.1807	4
MRPL53	0.019915	0.011083	0.172754	1479	-0.72605	5
C7orf49	0.019918	0.01679	0.235233	1480	-0.40704	4
C1orf186	0.019918	0.01679	0.235233	1481	-0.71629	4
NXPE4	0.019918	0.01679	0.235233	1482	-0.72512	4
POP7	0.019923	0.011083	0.172754	1483	-1.5014	6
SNURF	0.019935	0.01679	0.235233	1484	-0.43033	4
UNC119B	0.019955	0.011083	0.172754	1485	-0.49293	4
F2R	0.019961	0.011083	0.172754	1486	-0.64446	5
PRKCB	0.019967	0.011083	0.172754	1487	-0.55042	5
BOLL	0.019971	0.01646	0.234429	1488	-0.83628	3
NR1D2	0.019993	0.011083	0.172754	1489	-0.80507	5
OR51D1	0.020061	0.011145	0.172754	1490	-0.23564	4
MRPL2	0.020115	0.011218	0.172754	1491	-0.21568	4
HNF4A	0.020117	0.01679	0.235233	1492	-0.60656	4
DDX43	0.020121	0.011218	0.172754	1493	-0.74698	5
LPCAT1	0.020178	0.01679	0.235233	1494	-0.51067	4
FAM20C	0.020235	0.011218	0.172754	1495	-0.37122	4
ATP5D	0.020236	0.011218	0.172754	1496	-0.63661	5
GPR34	0.020237	0.011218	0.172754	1497	-0.49352	6
CD3D	0.02025	0.011218	0.172754	1498	-0.60107	5
EXOSC1	0.02025	0.01668	0.235233	1499	-0.52941	4
DPH5	0.020265	0.011218	0.172754	1500	-0.61262	5
ABCD2	0.020285	0.016845	0.235233	1501	-0.67611	4
GSDMD	0.020322	0.01668	0.235233	1502	-0.85891	3
ILDR2	0.020326	0.011218	0.172754	1503	-0.54681	5
MAD2L2	0.020333	0.011218	0.172754	1504	-0.79525	6
NCOA1	0.020333	0.011218	0.172754	1505	-0.11697	4
TMSB15A	0.020345	0.016845	0.235233	1506	-0.38301	4
CORO6	0.020357	0.016845	0.235233	1507	-0.83715	5
MED10	0.020357	0.011218	0.172754	1508	-0.6454	5
CORO2B	0.020379	0.016845	0.235233	1509	-0.29988	5
YIPF6	0.0204	0.016845	0.235233	1510	-0.3958	4
TMEM91	0.020436	0.016845	0.235233	1511	-0.68274	4
MRPS31	0.020443	0.011218	0.172754	1512	-0.32062	5
SERINC5	0.020447	0.016727	0.235233	1513	-0.85891	4
USF1	0.020492	0.011218	0.172754	1514	-0.28267	4
SPP2	0.020519	0.011286	0.173034	1515	-0.47937	5
OR5AU1	0.02054	0.011311	0.173034	1516	-0.61189	5
COX8C	0.020542	0.016728	0.235233	1517	-0.64918	2
CDAN1	0.020548	0.011311	0.173034	1518	-0.79417	6
OGDHL	0.020556	0.011311	0.173034	1519	-0.48047	4
EXOSC3	0.020567	0.011311	0.173034	1520	-0.70132	4
RECQL5	0.020593	0.011372	0.173034	1521	-0.38549	5
YBEY	0.020606	0.011372	0.173034	1522	-0.74576	5
TMEM242	0.020608	0.011372	0.173034	1523	-0.33701	6
ZDHHC16	0.020634	0.016846	0.235233	1524	-0.73744	3
hsa-mir-145	0.020639	0.016728	0.235233	1525	-1.2346	3
SLC39A8	0.02064	0.011498	0.173855	1526	0.21368	2
MAP2K3	0.020645	0.011498	0.173855	1527	-0.2541	4
CNTROB	0.020657	0.011498	0.173855	1528	-0.72602	5
hsa-mir-660	0.020658	0.016728	0.235233	1529	-1.0259	4
PRDM13	0.020723	0.016846	0.235233	1530	-0.33526	3
ENPP7	0.020724	0.011498	0.173855	1531	-0.41475	5
PCDHA12	0.020744	0.016208	0.234429	1532	-1.1125	2
C1orf174	0.020756	0.011498	0.173855	1533	-0.40897	5
LOC154872	0.02077	0.011498	0.173855	1534	-0.21268	4
MLLT10	0.0208	0.011498	0.173855	1535	-0.70886	5
DDX25	0.020801	0.011498	0.173855	1536	-0.97512	5
TRMT61B	0.020822	0.011498	0.173855	1537	-1.2139	6
ATAT1	0.020849	0.016846	0.235233	1538	-0.8862	4
AKAP17A_X	0.020868	0.011571	0.174716	1539	-0.59823	4
ATP5C1	0.020871	0.016846	0.235233	1540	-0.95958	3
TFF3	0.020875	0.011571	0.174716	1541	-0.48343	6
PSMC2	0.020901	0.016846	0.235233	1542	-0.88914	5
INTS4	0.02093	0.01697	0.235233	1543	-0.7446	4
BANF1	0.020937	0.017033	0.235233	1544	-0.99791	4
BRI3BP	0.020975	0.017033	0.235233	1545	0.01808	3
PRM3	0.021027	0.016971	0.235233	1546	-0.098765	2
XPO7	0.021059	0.017163	0.235233	1547	-0.39648	4
HOXB4	0.021066	0.017163	0.235233	1548	-1.1906	5
hsa-mir-4320	0.021079	0.016958	0.235233	1549	-0.8221	4
EIF5A2	0.021102	0.017163	0.235233	1550	-0.71692	6
CSF3R	0.021102	0.017315	0.235233	1551	-0.54647	3
HIST2H3D	0.021105	0.01729	0.235233	1552	-0.84249	4
SLC6A16	0.021118	0.017315	0.235233	1553	-0.54652	3
L3MBTL1	0.021124	0.017164	0.235233	1554	-0.81424	4
hsa-mir-5699	0.021128	0.017385	0.235233	1555	-2.3023	3
ZNF493	0.02114	0.017164	0.235233	1556	-0.74088	5
SPATA8	0.021159	0.017164	0.235233	1557	-0.2216	3
NME1-NME2	0.021172	0.014182	0.210749	1558	-0.51	2
FAM205A	0.021188	0.017571	0.235233	1559	-0.37241	4
LSM5	0.021199	0.017315	0.235233	1560	-0.85891	4
TRIM21	0.021206	0.017572	0.235233	1561	-0.54639	5
BRAF	0.021227	0.017572	0.235233	1562	-0.34271	5
PAK1IP1	0.021253	0.0177	0.235233	1563	-0.79371	5
GLCCI1	0.021274	0.017385	0.235233	1564	-0.65965	3
PPP1R9B	0.021299	0.017739	0.235233	1565	-0.54435	4
NCOA6	0.021315	0.017739	0.235233	1566	-0.50524	4
DCTN5	0.02133	0.017739	0.235233	1567	-0.87134	5
RBMY1A1	0.02137	0.017739	0.235233	1568	0.051052	3
hsa-mir-2277	0.021415	0.016876	0.235233	1569	-1.2082	3
AS3MT	0.021433	0.017739	0.235233	1570	-0.5925	5
HSF2	0.021436	0.017739	0.235233	1571	-0.49385	5
hsa-mir-8067	0.021451	0.017468	0.235233	1572	-1.3695	4
FNIP2	0.021504	0.017548	0.235233	1573	-0.48365	3
PSG2	0.021531	0.017548	0.235233	1574	-0.63187	3
APOL2	0.021533	0.017777	0.235233	1575	-0.44368	5
hsa-mir-632	0.021556	0.017352	0.235233	1576	-1.233	3
NRM	0.021562	0.017548	0.235233	1577	-0.50384	4
ART5	0.021562	0.017548	0.235233	1578	-0.33909	2
HIATL1	0.021584	0.017549	0.235233	1579	-0.74924	3
MROH8	0.021586	0.017777	0.235233	1580	-0.64122	5
CDH3	0.021588	0.017777	0.235233	1581	-0.31447	3
INHBC	0.02159	0.017777	0.235233	1582	-0.43177	5
IRF7	0.02159	0.017777	0.235233	1583	-0.5291	4
CDC42EP5	0.02159	0.017777	0.235233	1584	-0.33123	4
RAD51B	0.021594	0.017777	0.235233	1585	-0.43762	5
AP3M2	0.021597	0.017777	0.235233	1586	-0.42736	6
NCBP2	0.021627	0.017512	0.235233	1587	-0.75251	4
TP53RK	0.021643	0.017512	0.235233	1588	-0.83178	3
GABARAPL1	0.021644	0.017549	0.235233	1589	-0.9625	4
THSD4	0.021674	0.017777	0.235233	1590	-0.60651	5
CLEC19A	0.021697	0.017778	0.235233	1591	-0.76725	4
KRTAP4-2	0.021707	0.017512	0.235233	1592	-0.71508	3
GABPA	0.021718	0.017778	0.235233	1593	-1.0739	5
TTC23	0.021729	0.017657	0.235233	1594	-0.71787	5
RBM14	0.02173	0.017657	0.235233	1595	-0.59097	5
PDPK1	0.021735	0.017721	0.235233	1596	-0.72178	4
MCUR1	0.021742	0.017721	0.235233	1597	-0.65832	4
RPF1	0.021744	0.017512	0.235233	1598	-0.85891	3
PFN1	0.021769	0.017778	0.235233	1599	-0.42992	6
PALM	0.021795	0.017778	0.235233	1600	-0.55604	5
TRAPPC8	0.021857	0.017778	0.235233	1601	-0.74711	4
HCST	0.021876	0.017778	0.235233	1602	-0.45637	4
COL4A6	0.021883	0.017778	0.235233	1603	-0.25427	4
H1FX	0.021887	0.017778	0.235233	1604	-0.56589	3
hsa-mir-4311	0.021906	0.017512	0.235233	1605	-1.5931	3
HECTD3	0.021915	0.017778	0.235233	1606	-0.2725	4
TRIM31	0.021935	0.018256	0.235233	1607	-0.46756	4
FBXO11	0.021955	0.018256	0.235233	1608	-0.59277	4
P2RY14	0.022004	0.018256	0.235233	1609	-0.57354	5
ERAL1	0.022033	0.017849	0.235233	1610	-0.33078	4
VASH1	0.02205	0.017849	0.235233	1611	-0.61911	5
MRPL9	0.022076	0.017909	0.235233	1612	-0.83803	5
NDUFC1	0.022078	0.017909	0.235233	1613	-0.27698	3
OR11H1	0.022119	0.01791	0.235233	1614	-0.63095	4
RC3H1	0.022151	0.017565	0.235233	1615	-0.86227	4
YRDC	0.022181	0.018256	0.235233	1616	-0.6559	4
hsa-mir-6078	0.022191	0.017515	0.235233	1617	-1.5806	3
LIMA1	0.022209	0.018256	0.235233	1618	-0.50492	3
CEP250	0.02221	0.017983	0.235233	1619	-0.38301	4
KIAA0226	0.022219	0.018256	0.235233	1620	-0.79356	4
YTHDF2	0.022247	0.018256	0.235233	1621	-0.46203	3
GLTSCR2	0.022265	0.018378	0.235233	1622	-0.25637	3
ASPHD1	0.022275	0.018378	0.235233	1623	-0.42478	4
TUFM	0.022276	0.018378	0.235233	1624	-0.74798	5
LETM1	0.022276	0.018378	0.235233	1625	-1.7256	6
TMEM255A	0.022276	0.018378	0.235233	1626	-1.3918	5
DNAI2	0.022276	0.018378	0.235233	1627	-1.1722	5
DHX33	0.022276	0.018378	0.235233	1628	-0.73294	6
ZNF558	0.022276	0.018378	0.235233	1629	-0.64437	6
TM9SF1	0.022276	0.018378	0.235233	1630	-0.35133	5
NFYC	0.022276	0.018378	0.235233	1631	-0.90723	5
TRMT6	0.022276	0.018378	0.235233	1632	-0.89011	6
FAM212B	0.022296	0.018378	0.235233	1633	0.23098	1
RPS16	0.022298	0.018256	0.235233	1634	-0.97443	4
NPHP4	0.0223	0.018256	0.235233	1635	-0.537	4
UBE2A	0.02235	0.018378	0.235233	1636	-0.34367	6
ZP3	0.02236	0.018378	0.235233	1637	-0.90657	5
SCXA	0.022364	0.018378	0.235233	1638	-0.3208	4
SLC20A2	0.022369	0.018256	0.235233	1639	-0.81206	5
CCNA2	0.022369	0.018256	0.235233	1640	-1.526	5
SMARCD2	0.022373	0.018256	0.235233	1641	-0.58481	4
KRT33A	0.022381	0.018256	0.235233	1642	-0.87813	4
OR2A2	0.022404	0.018256	0.235233	1643	-0.48683	3
ASAP2	0.022405	0.018378	0.235233	1644	0.36506	3
ATMIN	0.022422	0.017829	0.235233	1645	-0.51758	3
BLZF1	0.022427	0.018378	0.235233	1646	-0.46664	3
MRPL51	0.022468	0.018256	0.235233	1647	-0.36463	3
FAM195A	0.022485	0.018256	0.235233	1648	-0.75638	4
ADH5	0.022584	0.018256	0.235233	1649	-0.67464	4
SLAIN2	0.022592	0.018256	0.235233	1650	-0.44668	4
PAX4	0.022761	0.018446	0.235233	1651	-0.44572	5
FOXA2	0.022761	0.018446	0.235233	1652	-1.6222	6
METTL20	0.0228	0.018446	0.235233	1653	-0.61999	5
MXD3	0.022806	0.018446	0.235233	1654	-0.6556	5
TTC19	0.022806	0.018446	0.235233	1655	-0.13548	5
SPAM1	0.022825	0.018446	0.235233	1656	-0.44271	6
HIST1H2BD	0.022827	0.018256	0.235233	1657	-0.8286	4
hsa-mir-6069	0.022855	0.017515	0.235233	1658	-2.6092	3
hsa-mir-4529	0.022885	0.017706	0.235233	1659	-0.93076	3
EIF3L	0.02289	0.018256	0.235233	1660	-0.78003	5
STK40	0.02291	0.018446	0.235233	1661	-0.44594	5
CBFA2T2	0.022934	0.018256	0.235233	1662	-0.80846	3
LTBP4	0.022934	0.018256	0.235233	1663	-1.2639	4
CABP2	0.022934	0.018256	0.235233	1664	-0.66795	4
MRPL13	0.022934	0.018256	0.235233	1665	-0.79051	3
AQP3	0.022945	0.018256	0.235233	1666	-0.90706	4
GHSR	0.023004	0.018446	0.235233	1667	0.43182	2
hsa-mir-8064	0.023016	0.018186	0.235233	1668	-1.4356	4
STEAP1B	0.023058	0.01848	0.235233	1669	-0.09255	3
HNRNPC	0.023079	0.018322	0.235233	1670	-0.97019	4
PRR16	0.023102	0.01848	0.235233	1671	-0.71208	6
C11orf73	0.023121	0.01848	0.235233	1672	-0.51363	6
RPS12	0.023167	0.018322	0.235233	1673	-0.92712	5
hsa-mir-4764	0.023182	0.017706	0.235233	1674	-0.93747	3
SAMSN1	0.023204	0.01848	0.235233	1675	-0.16908	3
PTPDC1	0.023213	0.018322	0.235233	1676	-1.1263	3
LONRF3	0.023327	0.018481	0.235233	1677	-0.53768	5
CDC42	0.023329	0.018322	0.235233	1678	-0.52727	3
CD83	0.02333	0.018481	0.235233	1679	-0.2116	4
TG	0.023347	0.018288	0.235233	1680	-0.74969	3
EIF3B	0.02338	0.018288	0.235233	1681	-1.0174	3
RELL1	0.023386	0.018322	0.235233	1682	-0.71199	3
CEACAM7	0.023398	0.018481	0.235233	1683	0.02689	3
GTPBP8	0.023436	0.018518	0.235233	1684	-0.55993	5
DAPK2	0.023482	0.018322	0.235233	1685	-0.5536	4
PPT2	0.023488	0.018349	0.235233	1686	-0.82971	3
TP53INP2	0.023503	0.018599	0.235233	1687	-0.50425	4
DYNLL1	0.023504	0.018349	0.235233	1688	-0.77196	4
UBE2O	0.023505	0.018599	0.235233	1689	-0.53043	5
RBM38	0.023519	0.018322	0.235233	1690	-1.0465	4
EHBP1L1	0.023526	0.018322	0.235233	1691	-1.0886	3
CTDSPL	0.023526	0.018349	0.235233	1692	-0.65151	2
POFUT1	0.023539	0.018642	0.235233	1693	-0.85282	5
CCM2L	0.023565	0.018322	0.235233	1694	-0.68049	4
C8orf58	0.023571	0.018322	0.235233	1695	-0.61573	4
GUCY2D	0.023602	0.018642	0.235233	1696	-0.019552	3
THPO	0.023609	0.018322	0.235233	1697	-0.86085	5
TAP1	0.02361	0.018642	0.235233	1698	0.11483	2
DERL1	0.023633	0.018322	0.235233	1699	-0.80371	5
RMND5A	0.023662	0.018322	0.235233	1700	-0.44186	4
LRRC46	0.023664	0.018642	0.235233	1701	-0.89541	5
FOXQ1	0.023736	0.018642	0.235233	1702	-1.1079	4
ARL5C	0.023752	0.018642	0.235233	1703	-0.69966	4
NDUFS8	0.023798	0.01835	0.235233	1704	-1.1065	4
SOWAHA	0.023814	0.018737	0.235233	1705	-0.5679	3
PLEKHM2	0.023822	0.018737	0.235233	1706	-0.86227	4
CREM	0.023823	0.018737	0.235233	1707	-0.55451	4
ODF4	0.023865	0.018782	0.235233	1708	-0.58565	5
ERCC4	0.02387	0.018783	0.235233	1709	-0.71332	4
FBXO46	0.023871	0.018737	0.235233	1710	-0.34016	3
HNRNPA1	0.023885	0.019098	0.236147	1711	-0.8741	3
PCDHA1	0.023899	0.018822	0.235233	1712	-0.18633	5
TCP11X2	0.023913	0.01835	0.235233	1713	-0.85891	4
ZNF711	0.02393	0.018858	0.235233	1714	-0.09116	4
CSF1	0.023979	0.019169	0.236147	1715	-0.05742	2
TRPV5	0.023983	0.018858	0.235233	1716	-0.14184	4
GLIS1	0.023999	0.01835	0.235233	1717	-0.85891	4
MYO1G	0.024005	0.018858	0.235233	1718	-0.59023	4
PTPLA	0.024025	0.019169	0.236147	1719	0.044738	1
ACLY	0.024038	0.018858	0.235233	1720	-0.5391	5
EIF4G1	0.024043	0.018858	0.235233	1721	-1.2305	5
ANXA3	0.024048	0.018858	0.235233	1722	-0.41411	4
HTRA4	0.024091	0.019169	0.236147	1723	-0.35353	3
XPO5	0.024115	0.019169	0.236147	1724	-0.37407	5
ZNF839	0.024121	0.018858	0.235233	1725	-0.67989	5
PSD4	0.024121	0.018858	0.235233	1726	-0.66641	4
NAA10	0.024121	0.018858	0.235233	1727	-0.99034	5
FUCA1	0.024121	0.018858	0.235233	1728	-0.36208	4
ZNF593	0.024121	0.018858	0.235233	1729	-1.2064	6
AXL	0.024121	0.018858	0.235233	1730	-0.48374	5
C3orf17	0.024121	0.018858	0.235233	1731	-1.148	5
CBFA2T3	0.024121	0.018858	0.235233	1732	-0.91308	5
SFSWAP	0.024139	0.018566	0.235233	1733	-0.72016	4
KRT28	0.024143	0.018566	0.235233	1734	-0.54441	2
MRPL17	0.024146	0.018858	0.235233	1735	0.74522	2
MATK	0.02418	0.018566	0.235233	1736	-0.7076	3
CAMK1D	0.0242	0.018858	0.235233	1737	-0.87592	5
MT1X	0.024204	0.021001	0.236147	1738	-0.85891	3
GUK1	0.024206	0.019169	0.236147	1739	-0.28762	2
TCN2	0.024246	0.018858	0.235233	1740	-0.59706	5
ZFHX4	0.024255	0.018858	0.235233	1741	-0.19914	4
PBRM1	0.024289	0.018905	0.235684	1742	-0.68382	3
FGD1	0.02431	0.01927	0.236147	1743	0.03084	2
DHX15	0.024353	0.019169	0.236147	1744	-0.58287	4
USP17L15	0.024353	0.019169	0.236147	1745	-0.69914	4
ZDHHC6	0.024356	0.019169	0.236147	1746	-0.68863	4
hsa-mir-662	0.024356	0.010006	0.1671	1747	-0.85891	1
TCEAL3	0.024373	0.019169	0.236147	1748	-0.61488	4
DUSP27	0.024387	0.019169	0.236147	1749	-0.43261	3
MREG	0.024433	0.019169	0.236147	1750	-0.3111	3
HOXC9	0.024435	0.01927	0.236147	1751	-0.6037	4
DAP3	0.024459	0.019342	0.236147	1752	-0.91211	5
IFNA10	0.024459	0.019342	0.236147	1753	-0.67097	4
TENM2	0.024459	0.019342	0.236147	1754	-0.47223	4
TBL3	0.024459	0.019342	0.236147	1755	-1.0472	4
DCUN1D2	0.024505	0.019414	0.236147	1756	-0.32736	5
DHRS3	0.024525	0.019169	0.236147	1757	-0.85891	3
SNAPC5	0.024549	0.019546	0.236147	1758	-0.76962	5
hsa-mir-323a	0.024581	0.019009	0.236147	1759	-1.5134	4
hsa-mir-4723	0.024609	0.019059	0.236147	1760	-1.2124	4
ERCC6L2	0.024645	0.019414	0.236147	1761	-0.12527	4
EPSTI1	0.024655	0.019414	0.236147	1762	-1.0543	6
RNFT2	0.024689	0.019546	0.236147	1763	-0.88288	3
ANAPC16	0.02469	0.019415	0.236147	1764	0.35705	1
C17orf49	0.024714	0.019546	0.236147	1765	-0.8661	4
RRP9	0.024725	0.019226	0.236147	1766	-0.7821	3
ZNF324B	0.024733	0.019415	0.236147	1767	-0.52599	5
PEX2	0.024736	0.019415	0.236147	1768	-0.41806	5
CD2AP	0.024742	0.019415	0.236147	1769	-0.48712	5
EPN3	0.024795	0.019226	0.236147	1770	-0.73411	3
HES2	0.024797	0.019226	0.236147	1771	-0.85891	4
SSFA2	0.024824	0.019415	0.236147	1772	-0.5747	5
SMARCA2	0.024841	0.01979	0.236147	1773	-0.62142	3
TBC1D2	0.024864	0.019226	0.236147	1774	-0.60854	2
APLP1	0.024864	0.019415	0.236147	1775	-0.3323	3
SH3D19	0.024907	0.019881	0.236147	1776	0.23575	3
SLC2A14	0.024938	0.01979	0.236147	1777	-0.6002	3
DGCR8	0.024942	0.01979	0.236147	1778	-0.61224	3
DENND5B	0.024943	0.019882	0.236147	1779	-0.48237	4
TBX6	0.024962	0.019882	0.236147	1780	-0.2267	4
ZZEF1	0.025006	0.019951	0.236147	1781	0.08562	2
GORAB	0.025016	0.019951	0.236147	1782	-0.41246	5
NR5A1	0.025026	0.019951	0.236147	1783	-0.38432	4
PRCC	0.025056	0.019951	0.236147	1784	-0.14088	3
LRFN4	0.025067	0.019791	0.236147	1785	-0.70104	3
ATG16L2	0.025071	0.019951	0.236147	1786	-0.21796	3
DNASE1	0.025078	0.019951	0.236147	1787	-0.39051	4
ADAM8	0.025113	0.01993	0.236147	1788	-0.057509	2
KRTAP1-1	0.025117	0.019951	0.236147	1789	-0.36964	4
SEPSECS	0.025129	0.01993	0.236147	1790	-0.81692	5
hsa-mir-1180	0.02515	0.021002	0.236147	1791	-1.5706	3
ATP5E	0.02515	0.021002	0.236147	1792	-1.5077	3
SCRN3	0.025194	0.019951	0.236147	1793	-0.021755	3
IMPG2	0.025204	0.01993	0.236147	1794	-0.78509	4
TSSK4	0.025207	0.019951	0.236147	1795	-0.9562	5
KIAA0355	0.025234	0.019951	0.236147	1796	-0.72171	5
FAM8A1	0.025249	0.019951	0.236147	1797	-0.42271	5
hsa-mir-4486	0.025299	0.019448	0.236147	1798	-1.8727	4
SPINT3	0.025304	0.01993	0.236147	1799	-0.67728	3
SYVN1	0.025305	0.019448	0.236147	1800	-0.85891	4
ARHGAP33	0.025317	0.019951	0.236147	1801	-1.5087	5
UBA52	0.025339	0.019931	0.236147	1802	-0.44493	3
FGF1	0.025389	0.021243	0.236177	1803	-0.85891	3
EPN1	0.02539	0.019951	0.236147	1804	-0.78927	5
C1D	0.025395	0.019931	0.236147	1805	-0.77993	4
TTLL10	0.025396	0.019951	0.236147	1806	-0.12305	4
ARRDC3	0.025397	0.019951	0.236147	1807	-0.91896	5
SPATA4	0.025403	0.019951	0.236147	1808	-0.65782	5
TNPO3	0.025433	0.019931	0.236147	1809	-0.41324	5
KIAA0895	0.025474	0.019951	0.236147	1810	-0.45324	6
SEPHS2	0.025475	0.019931	0.236147	1811	-0.60091	3
KDM5B	0.025496	0.019931	0.236147	1812	-0.90762	4
NR1H4	0.025505	0.020091	0.236147	1813	-0.75897	5
TUBA1B	0.025509	0.019571	0.236147	1814	-0.92349	3
TAPT1	0.025512	0.019931	0.236147	1815	-0.34571	3
NHEJ1	0.025515	0.020253	0.236147	1816	-0.55679	5
SS18L2	0.025525	0.019931	0.236147	1817	-0.77649	5
NAPB	0.025537	0.01963	0.236147	1818	-0.73493	4
WDR34	0.025555	0.020328	0.236147	1819	-0.80798	6
ABL1	0.025559	0.020328	0.236147	1820	-0.21588	4
TTK	0.025562	0.020328	0.236147	1821	-0.54399	4
IPO9	0.025582	0.020328	0.236147	1822	-0.32908	4
TRIM47	0.025614	0.020328	0.236147	1823	-0.16454	3
NDNL2	0.025655	0.020328	0.236147	1824	-0.68292	5
PPWD1	0.025656	0.020009	0.236147	1825	-0.52068	4
C10orf88	0.025661	0.020328	0.236147	1826	-0.7687	6
OR2T33	0.025663	0.020009	0.236147	1827	-0.78329	4
OR2A25	0.025673	0.020009	0.236147	1828	-0.60677	5
GRINA	0.025705	0.019694	0.236147	1829	-0.66794	3
ULBP1	0.02572	0.020328	0.236147	1830	-0.53557	5
DEDD2	0.025734	0.019694	0.236147	1831	-0.85891	4
WDR33	0.025736	0.020328	0.236147	1832	-0.81225	6
NUPL1	0.025772	0.019765	0.236147	1833	-0.85891	3
MYO19	0.025778	0.020414	0.236147	1834	-1.2497	6
SLC7A1	0.025806	0.020486	0.236147	1835	-0.79506	4
CEP85	0.025826	0.02001	0.236147	1836	-0.67462	4
MED4	0.025829	0.020486	0.236147	1837	-0.58951	6
ADSL	0.025831	0.020486	0.236147	1838	-0.48577	5
PCDH11X	0.025842	0.020486	0.236147	1839	-0.23483	4
SC5D	0.025848	0.020486	0.236147	1840	-0.53092	5
LOC730183	0.025879	0.021686	0.236947	1841	-0.85891	3
NELFB	0.025883	0.020089	0.236147	1842	-0.99501	4
INTS1	0.025885	0.020486	0.236147	1843	-0.7526	5
MEA1	0.025919	0.020486	0.236147	1844	-0.39606	4
UBA5	0.025975	0.020089	0.236147	1845	-0.8403	4
DEFB104B	0.025979	0.011992	0.180561	1846	-0.66601	1
PPP1R35	0.025985	0.020487	0.236147	1847	-0.70952	4
SLC17A7	0.025994	0.020487	0.236147	1848	-0.57778	5
ADAM19	0.026033	0.020089	0.236147	1849	-0.5675	4
KCNK6	0.026048	0.020487	0.236147	1850	-0.36198	5
2025-03-03	0.026062	0.020487	0.236147	1851	-0.74366	6
ZNF568	0.026064	0.020089	0.236147	1852	-0.54497	3
DDX18	0.026067	0.020168	0.236147	1853	-0.85891	4
C15orf40	0.026104	0.020168	0.236147	1854	-0.44302	2
CACNA1H	0.026105	0.020487	0.236147	1855	-0.57259	5
LOC100507462	0.02611	0.021877	0.238914	1856	-0.85891	3
SCAF11	0.026114	0.020531	0.236147	1857	-0.43101	5
hsa-mir-3690-1	0.026142	0.020238	0.236147	1858	-0.80412	4
LOC100132247	0.026192	0.02061	0.236147	1859	-0.3869	5
PPP2R5A	0.026219	0.02061	0.236147	1860	-0.66603	5
TYMS	0.026236	0.02061	0.236147	1861	-0.26338	3
TMEM150A	0.026257	0.02061	0.236147	1862	-0.19249	3
C9orf84	0.026258	0.02061	0.236147	1863	-0.41283	3
hsa-mir-8075	0.026263	0.019688	0.236147	1864	-0.60444	1
FANK1	0.026265	0.020089	0.236147	1865	-0.65721	4
RAD9A	0.026265	0.020089	0.236147	1866	-2.2376	4
TEKT1	0.026285	0.02061	0.236147	1867	-0.69273	5
C1QTNF1	0.026296	0.02061	0.236147	1868	-0.5359	6
SPINK8	0.02632	0.02061	0.236147	1869	-0.3122	4
RPS6KL1	0.026354	0.02061	0.236147	1870	-0.8875	4
LENG9	0.026354	0.02061	0.236147	1871	-0.59868	5
MYL3	0.026369	0.020238	0.236147	1872	-0.85891	4
FAM46D	0.026374	0.02061	0.236147	1873	-0.36104	4
SAMD11	0.026428	0.02061	0.236147	1874	0.85243	2
NEK2	0.026561	0.020802	0.236147	1875	-0.35687	3
CHAMP1	0.026561	0.020802	0.236147	1876	-0.56586	4
AGXT2	0.026562	0.020504	0.236147	1877	-0.34955	3
C16orf80	0.026607	0.020504	0.236147	1878	-0.34223	2
HRG	0.026641	0.020525	0.236147	1879	-0.85891	4
LHPP	0.026648	0.020525	0.236147	1880	-0.36048	2
NRP1	0.026688	0.020802	0.236147	1881	-0.49628	6
NDUFA8	0.026695	0.020802	0.236147	1882	-0.26502	5
RARA	0.0267	0.020802	0.236147	1883	-0.035103	3
PPP1R10	0.026701	0.020504	0.236147	1884	-0.85598	5
MCC	0.026717	0.020504	0.236147	1885	-0.76587	4
ACP2	0.026743	0.020504	0.236147	1886	-0.49583	3
MRPS6	0.026746	0.020504	0.236147	1887	-0.65938	4
LARGE	0.026776	0.020802	0.236147	1888	-0.31337	4
GDF7	0.026809	0.020802	0.236147	1889	-0.91289	6
ZFC3H1	0.026826	0.020802	0.236147	1890	-0.82088	6
PRAMEF12	0.026847	0.020505	0.236147	1891	-0.49847	4
MAPK3	0.026879	0.020505	0.236147	1892	-0.42568	3
SLC43A2	0.026887	0.020802	0.236147	1893	-0.31193	3
PRR5	0.026897	0.020802	0.236147	1894	-0.32407	4
DHX38	0.026906	0.020505	0.236147	1895	-1.5589	5
TSFM	0.026908	0.020802	0.236147	1896	-0.91338	5
PPP1R12C	0.026917	0.020802	0.236147	1897	-0.17289	4
MKI67IP	0.026924	0.020505	0.236147	1898	-0.9565	4
NLGN4X	0.026925	0.020526	0.236147	1899	-0.56167	4
RLF	0.026969	0.021326	0.236177	1900	-0.5925	3
ZP4	0.026971	0.020802	0.236147	1901	0.19775	3
hsa-mir-8059	0.026978	0.020642	0.236147	1902	-1.0907	2
SH3BP5	0.027	0.021326	0.236177	1903	-0.53229	5
PTGS1	0.027005	0.021326	0.236177	1904	-0.50664	5
LRP12	0.027033	0.020802	0.236147	1905	-0.011507	3
ANKRD44	0.027074	0.020802	0.236147	1906	-0.7248	5
CDKL5	0.027076	0.020802	0.236147	1907	-0.43292	4
N6AMT2	0.027079	0.020802	0.236147	1908	-0.22689	4
FURIN	0.027135	0.020802	0.236147	1909	-0.38751	6
SLC38A10	0.027139	0.020802	0.236147	1910	-0.47976	6
CSTF3	0.027159	0.020699	0.236147	1911	-0.85891	3
CHRNA2	0.02718	0.020836	0.236147	1912	-0.92714	4
C7orf34	0.027188	0.020836	0.236147	1913	-0.52942	5
OR2T27	0.027192	0.020699	0.236147	1914	-0.85891	3
hsa-mir-609	0.027225	0.022164	0.240602	1915	-0.77919	3
hsa-mir-141	0.027234	0.020699	0.236147	1916	-1.3502	4
ITIH1	0.027242	0.02108	0.236147	1917	0.028394	3
SLC35A1	0.027275	0.02108	0.236147	1918	-0.34702	3
TMEM160	0.02729	0.02108	0.236147	1919	-0.53576	4
CXXC1	0.027371	0.02108	0.236147	1920	-0.95836	5
VWA2	0.027381	0.02108	0.236147	1921	-0.56087	4
PRR23C	0.027416	0.02108	0.236147	1922	-0.75069	5
ZNF287	0.02742	0.021448	0.236177	1923	-0.55638	4
APAF1	0.027435	0.02108	0.236147	1924	-0.90833	5
hsa-mir-1273h	0.027448	0.022164	0.240602	1925	-1.0777	3
NUBPL	0.02745	0.02108	0.236147	1926	-1.0116	6
POC1A	0.027463	0.021121	0.236147	1927	-0.31536	5
CLIC5	0.027467	0.021448	0.236177	1928	-0.55628	4
FKBP14	0.027497	0.021121	0.236147	1929	-0.43667	4
OR4F17	0.027513	0.021121	0.236147	1930	-0.18016	4
IL1RL1	0.027533	0.021121	0.236147	1931	-0.49524	4
FAM32A	0.02758	0.020816	0.236147	1932	-0.72827	3
ZBTB5	0.027597	0.021121	0.236147	1933	-0.60607	5
TCOF1	0.027603	0.021448	0.236177	1934	-0.22946	3
SSBP2	0.027623	0.021121	0.236147	1935	-0.45668	5
PPP1R9A	0.027644	0.020816	0.236147	1936	-0.65682	3
HR	0.027682	0.021121	0.236147	1937	-0.36381	5
GAL3ST4	0.027702	0.021154	0.236147	1938	-0.34645	4
PTPN14	0.027725	0.021154	0.236147	1939	-0.55882	6
MYO1E	0.027765	0.021155	0.236147	1940	-0.67717	5
PNLIPRP2	0.027779	0.021155	0.236147	1941	-0.39852	5
DUSP18	0.027784	0.021155	0.236147	1942	-0.53285	5
ZBED6	0.027789	0.021155	0.236147	1943	-0.60274	5
HNRNPL	0.027789	0.021155	0.236147	1944	-1.0949	4
RBPMS	0.027789	0.021155	0.236147	1945	-0.57566	5
FAM170A	0.027792	0.021448	0.236177	1946	-0.67577	4
ALG2	0.027799	0.021155	0.236147	1947	-0.66611	4
INO80B	0.027839	0.02124	0.236177	1948	-0.52387	4
PRSS46	0.027847	0.021281	0.236177	1949	-0.45167	5
PLIN3	0.027854	0.021323	0.236177	1950	-0.35348	5
NOC3L	0.027862	0.021002	0.236147	1951	-0.66029	3
SCTR	0.027881	0.021323	0.236177	1952	-0.66513	5
TAS2R30	0.027916	0.021119	0.236147	1953	-0.85891	2
hsa-mir-449b	0.027917	0.022165	0.240602	1954	-1.5156	2
SIX5	0.027925	0.021119	0.236147	1955	-0.83458	3
CUL3	0.027929	0.021119	0.236147	1956	-0.85891	4
HRAS	0.02795	0.021323	0.236177	1957	-0.62981	5
ZNF214	0.027952	0.021119	0.236147	1958	-0.67098	4
ACOX3	0.027969	0.021323	0.236177	1959	-0.49261	6
ZNF345	0.028001	0.021323	0.236177	1960	-0.45005	4
HIBADH	0.028027	0.021416	0.236177	1961	-0.6754	6
CCHCR1	0.028034	0.021416	0.236177	1962	-0.71384	4
SLC37A1	0.028035	0.021416	0.236177	1963	-0.50694	4
HMOX2	0.028055	0.021416	0.236177	1964	-0.11356	4
ADAMTSL2	0.028073	0.021448	0.236177	1965	-0.69031	3
ACADS	0.028073	0.021416	0.236177	1966	-0.83558	4
SLMO2	0.028083	0.022165	0.240602	1967	-0.85891	3
SPAG5	0.028112	0.021448	0.236177	1968	-0.46899	5
PRCD	0.028142	0.021448	0.236177	1969	-0.83977	5
TAF2	0.028156	0.021417	0.236177	1970	-0.35026	3
SCN3B	0.028166	0.021417	0.236177	1971	-0.39841	5
BSX	0.028183	0.021516	0.236401	1972	-0.94999	3
AIMP2	0.028198	0.021451	0.236177	1973	-0.46349	5
PTPLAD2	0.028207	0.021584	0.23643	1974	-0.8805	4
PRPF18	0.028207	0.021584	0.23643	1975	-0.70543	4
ZFAND6	0.028207	0.021584	0.23643	1976	-0.63118	4
LOC339862	0.028207	0.021584	0.23643	1977	-0.86892	4
LOC100130705	0.028272	0.021452	0.236177	1978	-0.097666	3
SQRDL	0.028309	0.021492	0.23626	1979	-0.52347	4
CEACAM3	0.028358	0.021492	0.23626	1980	-1.43	6
RAPGEF3	0.028358	0.021492	0.23626	1981	-0.56825	4
TRIM7	0.028372	0.021581	0.23643	1982	-0.61651	6
WDR96	0.028498	0.021581	0.23643	1983	-0.64158	4
CEP44	0.028543	0.021627	0.236432	1984	-0.68656	5
ATP9B	0.028547	0.021627	0.236432	1985	-0.39051	5
IKBKG	0.028571	0.021628	0.236432	1986	-0.48278	5
ESR1	0.028585	0.02199	0.239312	1987	-0.53077	4
RABEP2	0.028597	0.024691	0.246524	1988	-0.7936	4
LIPE	0.028598	0.021991	0.239312	1989	-0.66322	4
SPON1	0.028602	0.021628	0.236432	1990	-0.37165	5
ACVR1	0.028651	0.021954	0.239312	1991	-0.16557	4
NTHL1	0.028652	0.021954	0.239312	1992	-0.59196	5
CASP2	0.028688	0.021991	0.239312	1993	-0.23212	3
ITGAV	0.028699	0.021991	0.239312	1994	-0.72981	3
MLLT11	0.028763	0.021954	0.239312	1995	-0.63256	5
ZNF19	0.028823	0.022127	0.240602	1996	-0.50269	4
hsa-mir-5701-1	0.02884	0.024872	0.246524	1997	-0.80382	4
hsa-mir-5739	0.02884	0.024872	0.246524	1998	-0.7016	4
[truncated: 18,670 more rows]
